# Supplementary material
Source: PubMed Central journal article supplement (PMC3134165)
Supplement: NIHMS305704-supplement-4_si_004.pdf [file NIHMS305704-supplement-4_si_004.pdf]

## Supporting Information

# A Geometric and Electrostatic Study of the [4Fe-4S] Cluster of Adenosine-5'-Phosphosulfate Reductase from Broken Symmetry Density Functional Calculations and Extended X-ray Absorption Fine Structure Spectroscopy

Devayani P. Bhave,<sup>†</sup> Wen-Ge Han,<sup>‡</sup> Samuel Pazicni,<sup>§</sup> James E. Penner-Hahn,<sup>¶</sup>

Kate S. Carroll,<sup>†§\*</sup> and Louis Noodleman<sup>‡\*</sup>

<sup>†</sup>Chemical Biology Graduate Program, <sup>¶</sup>Departments of Chemistry and <sup>||</sup>Biophysics, University of Michigan, Ann Arbor, Michigan, 48109-2216.

<sup>‡</sup>Department of Molecular Biology, The Scripps Research Institute, 10550 North Torrey Pines Road, La Jolla, California 92037

<sup>§</sup>Department of Chemistry, The Scripps Research Institute, 130 Scripps Way, Jupiter, Florida 33458.

## Supplementary Figure Legends

**Supplementary Fig. 1.** Structure-based sequence alignment of APS reductases from *Pseudomonas aeruginosa* and *Mycobacterium tuberculosis*. The ClustalW Multiple Sequence Alignment program was used. Strictly conserved residues are outlined in red, red letters indicate conserved residues and conserved regions are boxed in blue. Residues flanking the active site are outlined in green.

**Supplementary Fig. 2.** Comparison of XAS spectra for Mt-APSR with and without APS bound. A) XANES spectra; B)  $k^3$  weighted EXAFS; and C) Fourier transforms.

**Supplementary Fig. 3.** Comparison of the  $k^3$  weighted EXAFS (top) and the Fourier transforms for Mt-APSR, [4Fe-4S] and [3Fe-4S] ferredoxins.

### Cartesian coordinates of the optimized Fe1·Fe2·Fe3·Fe4 state wild-type 4Fe-4S quantum cluster in chain-A.

211 atoms

|    |              |              |              |
|----|--------------|--------------|--------------|
| Fe | -0.107163578 | 0.141433877  | -0.071225829 |
| Fe | -0.198227030 | 0.084430746  | 2.610912383  |
| Fe | 2.183164085  | 0.143843532  | 1.371700639  |
| Fe | 0.718969659  | -2.061308632 | 1.140269589  |
| S  | 1.602736596  | -1.346877473 | 3.036453877  |
| S  | 1.870503940  | -0.965415894 | -0.539619531 |
| S  | -1.451681704 | -1.221230441 | 1.242881426  |
| S  | 0.537043229  | 1.778339840  | 1.252125310  |
| S  | -1.211913153 | 1.221988848  | 4.348255839  |
| S  | 4.314827513  | 0.829183148  | 1.584941905  |
| S  | 0.894538389  | -4.260319821 | 0.484547506  |
| S  | -1.023752245 | 0.914816947  | -2.007302940 |
| N  | 2.814945142  | -1.131756403 | 8.352908172  |
| C  | 2.630658353  | -2.528426347 | 8.028899337  |
| C  | 3.897498754  | -3.218330292 | 7.493887576  |
| N  | 4.760798954  | -2.437043051 | 6.824206595  |
| O  | 4.030531216  | -4.441947797 | 7.651548704  |
| C  | 1.510596542  | -2.683361765 | 7.002705823  |
| C  | 0.141270660  | -2.201435845 | 7.471692621  |
| C  | -0.833092416 | -2.236742036 | 6.296836826  |
| N  | -2.148793914 | -1.694652729 | 6.606272481  |
| C  | -3.202752462 | -2.359821474 | 7.066113476  |

|   |              |              |              |
|---|--------------|--------------|--------------|
| N | -3.144567271 | -3.659243998 | 7.350708690  |
| N | -4.365994470 | -1.704665019 | 7.227461965  |
| H | 2.373494881  | -3.061486604 | 8.949708325  |
| H | 1.450288698  | -3.741164636 | 6.749238435  |
| H | 1.800509062  | -2.148361516 | 6.091952257  |
| H | 0.197073979  | -1.173061913 | 7.844866198  |
| H | -0.219560016 | -2.833663836 | 8.292338539  |
| H | -0.939578601 | -3.248711057 | 5.905642582  |
| H | -0.442379369 | -1.617776027 | 5.489475859  |
| H | -2.269069799 | -0.699033027 | 6.446675358  |
| H | -2.377288059 | -4.242500672 | 7.028988864  |
| H | -4.008651983 | -4.144769876 | 7.567591018  |
| H | -4.330207597 | -0.693263267 | 7.311143786  |
| H | -5.072471442 | -2.149914533 | 7.804807027  |
| H | 2.558967275  | -0.423287359 | 7.666953264  |
| C | 5.977111000  | -2.929906000 | 6.238907000  |
| H | 6.869350000  | -2.636805000 | 6.801957000  |
| C | 1.997669812  | 5.097724892  | 0.562735770  |
| H | 1.743299000  | 6.022431000  | 0.036064000  |
| C | 2.707613436  | 5.349097582  | 1.874270553  |
| O | 2.599425940  | 4.582996234  | 2.842153837  |
| C | 2.788692722  | 4.158455198  | -0.366632709 |

|   |              |             |              |
|---|--------------|-------------|--------------|
| C | 4.171407136  | 4.562525602 | -0.726089756 |
| N | 4.493900142  | 5.599935530 | -1.579299724 |
| C | 5.813090571  | 5.684451499 | -1.732589854 |
| N | 6.349424273  | 4.723192536 | -0.992455757 |
| C | 5.364859830  | 4.013406729 | -0.357905298 |
| H | 1.056352157  | 4.596539551 | 0.795646930  |
| H | 2.206420649  | 4.034656240 | -1.283992115 |
| H | 2.861429080  | 3.180403701 | 0.105529851  |
| H | 3.835502010  | 6.213091144 | -2.053261167 |
| H | 5.578245489  | 3.169285533 | 0.274847642  |
| H | 6.343711652  | 6.396304492 | -2.343190209 |
| H | 7.349099906  | 4.554952497 | -0.911127970 |
| N | 1.851781405  | 2.441429385 | -6.986286499 |
| C | 1.539951000  | 3.763437000 | -6.462627000 |
| H | 1.476316000  | 4.465196000 | -7.300786000 |
| C | 0.602304989  | 3.062243297 | 5.631491151  |
| H | 0.982050000  | 4.110914000 | 5.606559000  |
| C | 1.756295478  | 2.068372025 | 5.591746219  |
| N | 2.579895950  | 2.117495110 | 4.517683197  |
| O | 1.946715695  | 1.271931071 | 6.524545166  |
| C | -0.445495449 | 2.903266299 | 4.522090288  |
| H | 0.130933071  | 2.918322961 | 6.608355728  |
| H | -1.267965945 | 3.595272964 | 4.738612644  |
| H | -0.025709614 | 3.180271091 | 3.555072790  |
| C | 3.755613999  | 1.264894101 | 4.414402282  |
| C | 4.649552585  | 1.385011288 | 5.642420468  |

|   |              |              |              |
|---|--------------|--------------|--------------|
| N | 4.852940320  | 2.632560987  | 6.084277666  |
| O | 5.249836736  | 0.409927522  | 6.109672809  |
| H | 2.439928186  | 2.834285655  | 3.810551462  |
| C | 4.640716655  | 1.629976360  | 3.206528167  |
| H | 3.455742591  | 0.217932421  | 4.357267917  |
| H | 4.632799117  | 2.716748419  | 3.075059041  |
| H | 5.668849935  | 1.347484651  | 3.455062010  |
| H | 5.323203000  | 2.690085000  | 6.970951000  |
| H | 0.920073657  | -5.162294918 | -2.422680393 |
| C | -0.066652883 | -5.299498191 | -1.970367177 |
| C | -1.121586470 | -5.053704819 | -3.021283633 |
| N | -2.216216683 | -5.823288715 | -2.950627555 |
| O | -1.020850860 | -4.126746215 | -3.844024174 |
| C | -0.314108093 | -4.241222707 | -0.890724195 |
| H | -0.133716460 | -6.310482364 | -1.556226841 |
| H | -0.269354869 | -3.259866189 | -1.363657588 |
| H | -1.318440501 | -4.369094126 | -0.472819566 |
| H | -3.034079000 | -5.540736000 | -3.483255000 |
| N | -2.438732123 | -1.134991812 | -4.093678569 |
| C | -1.379217093 | -0.256284965 | -4.523455290 |
| C | -0.652499495 | -0.722114230 | -5.791526197 |
| N | -0.973879323 | -1.936988002 | -6.245323764 |
| O | 0.198477658  | 0.015071503  | -6.305377188 |
| C | -0.356135303 | -0.077456745 | -3.401063682 |
| H | -1.830818095 | 0.706940452  | -4.775303509 |
| H | -0.031269820 | -1.059717558 | -3.047128378 |
| H | 0.514728034  | 0.422897408  | -3.822098570 |
| C | -0.358249000 | -2.570636000 | -7.389921000 |
| H | -1.111311000 | -2.639926000 | -8.181831000 |
| C | 1.008812071  | -6.173433679 | 5.268075699  |
| C | -0.384875398 | -6.389709039 | 5.799845004  |
| H | 1.466691000  | -7.130947000 | 5.085305000  |
| N | -0.963179494 | -7.540668443 | 5.424603407  |
| O | -0.942734331 | -5.591419167 | 6.571487584  |
| C | 1.131519288  | -5.429452514 | 3.942096624  |
| O | 0.177215033  | -5.994180754 | 3.030418686  |
| C | 2.556222095  | -5.597507510 | 3.434136432  |
| H | 1.596924646  | -5.666257177 | 6.033382962  |
| H | 0.908070043  | -4.366180708 | 4.084971676  |
| H | 0.282656739  | -5.482242524 | 2.184997661  |
| H | 2.742078412  | -4.976101329 | 2.557680914  |
| H | 2.726874286  | -6.647691473 | 3.164624520  |
| H | 3.272466642  | -5.320028509 | 4.209591446  |
| H | -1.938787000 | -7.684524000 | 5.661721000  |
| C | 3.080778000  | 0.711402000  | -8.141230000 |
| H | 3.027971000  | 0.637566000  | -9.232461000 |
| C | 2.900252454  | 2.169919822  | -7.776099284 |
| O | 3.679943971  | 3.049098994  | -8.193160390 |
| C | 4.468020634  | 0.178325561  | -7.745682969 |

|   |              |              |               |
|---|--------------|--------------|---------------|
| C | 4.663564514  | -1.305307100 | -8.075127872  |
| C | 4.070244442  | -2.278220530 | -7.058709543  |
| N | 4.758434579  | -2.248011769 | -5.765085018  |
| C | 5.882274403  | -2.888661125 | -5.446714106  |
| N | 6.492114473  | -2.576179494 | -4.282724603  |
| N | 6.386241751  | -3.836250940 | -6.222750176  |
| H | 2.282915943  | 0.102886085  | -7.716137729  |
| H | 4.658892271  | 0.366107375  | -6.681676941  |
| H | 5.216469753  | 0.752373463  | -8.301051296  |
| H | 5.735459257  | -1.519883670 | -8.169724586  |
| H | 4.213587556  | -1.531705317 | -9.051496357  |
| H | 4.085046523  | -3.301016899 | -7.445243215  |
| H | 3.024185533  | -2.059369455 | -6.840047832  |
| H | 4.419245054  | -1.586246986 | -5.076180558  |
| H | 6.474154410  | -1.595008641 | -4.022695565  |
| H | 7.393642776  | -3.016624988 | -4.118710936  |
| H | 5.823963652  | -4.284156895 | -6.936499629  |
| H | 7.227176185  | -4.322930812 | -5.931659799  |
| N | 3.516609831  | 6.419167490  | 1.929881111   |
| H | 4.046672000  | 6.552932000  | 2.783092000   |
| C | 6.235497073  | -2.572263417 | 4.770871983   |
| C | 5.334747867  | -3.314926617 | 3.791081710   |
| C | 5.589419338  | -3.016355742 | 2.311386526   |
| C | 6.883712395  | -3.610234684 | 1.791757732   |
| N | 7.032691457  | -3.320651862 | 0.328656602   |
| C | 2.580952725  | 4.279902513  | -5.443270928  |
| C | 2.954932322  | 3.272894846  | -4.397709648  |
| C | 2.082111902  | 2.636321616  | -3.551154712  |
| N | 2.743904218  | 1.693858144  | -2.808200805  |
| C | 4.068334810  | 1.701915111  | -3.140667291  |
| C | 4.243531899  | 2.696525269  | -4.141007179  |
| C | 5.121997219  | 0.935099373  | -2.646523870  |
| C | 6.386890755  | 1.173154207  | -3.161085637  |
| C | 6.594239144  | 2.163542071  | -4.139600584  |
| C | 5.541712394  | 2.924976485  | -4.622321091  |
| C | 0.165471568  | -3.973511496 | -7.039407791  |
| H | 0.736896000  | -4.386578000 | -7.879897000  |
| O | 1.053932726  | -3.969267659 | -5.919961232  |
| C | -3.748830460 | -0.834269085 | -4.106473549  |
| O | -4.265410215 | 0.171240276  | -4.602123323  |
| H | -4.321424000 | -1.617048000 | -3.604721000  |
| C | 3.223803242  | -0.686823622 | 9.550738005   |
| O | 3.526790657  | -1.389571173 | 10.519820306  |
| H | 3.237939000  | 0.408880000  | 9.561120000   |
| N | 5.756789645  | 4.764352652  | -9.458928009  |
| C | 6.867234570  | 4.052777097  | -9.214152532  |
| N | 6.950339478  | 3.384894639  | -8.055136326  |
| N | 7.891919616  | 4.092253793  | -10.053817752 |
| C | 9.146220609  | 3.357720176  | -9.894941087  |

|   |              |              |               |
|---|--------------|--------------|---------------|
| C | 9.027970000  | 1.861262000  | -10.151452000 |
| H | 8.816378000  | 1.617659000  | -11.197833000 |
| H | 4.606322935  | -1.433329427 | 6.779211379   |
| H | 1.289349613  | 1.661825885  | -6.657338257  |
| H | 4.222338319  | 3.385838804  | 5.838075662   |
| H | -2.334886945 | -6.515185150 | -2.219478947  |
| H | -1.742686214 | -2.422868962 | -5.796025079  |
| H | -0.552603981 | -8.129194086 | 4.709579256   |
| H | 3.588649907  | 7.104680572  | 1.188648967   |
| H | 7.286380968  | -2.832625758 | 4.588721753   |
| H | 6.145531238  | -1.490834549 | 4.628996021   |
| H | 4.294107104  | -3.055639933 | 3.998732344   |
| H | 5.434648259  | -4.394895724 | 3.959400056   |
| H | 5.581927526  | -1.932679896 | 2.146261581   |
| H | 4.758706422  | -3.430807948 | 1.725904620   |
| H | 6.906682387  | -4.699439297 | 1.885797451   |
| H | 7.770410690  | -3.186817548 | 2.266908576   |
| H | 7.903395296  | -3.720121307 | -0.044139584  |
| H | 7.064663363  | -2.308289355 | 0.158980088   |
| H | 6.255233343  | -3.724220311 | -0.208841311  |
| H | 0.552805203  | 3.692281051  | -5.999322601  |
| H | 2.161014731  | 5.188438580  | -4.988395253  |
| H | 3.477162461  | 4.586258403  | -5.987057630  |
| H | 1.020737636  | 2.779102712  | -3.415421949  |
| H | 2.325521041  | 1.109659627  | -2.092982607  |
| H | 4.956290849  | 0.202740719  | -1.864025746  |
| H | 7.236971459  | 0.608694237  | -2.783728876  |
| H | 7.601996806  | 2.339048499  | -4.508360745  |
| H | 5.729518326  | 3.711167585  | -5.345487333  |
| H | -2.172488533 | -1.987523830 | -3.605853601  |
| H | 0.452021815  | -1.925039689 | -7.728135736  |
| H | -0.684370702 | -4.643658364 | -6.849853435  |
| H | 0.482359550  | -3.930208400 | -5.123834966  |
| H | 9.986308614  | 1.393993448  | -9.893014236  |
| H | 8.255758348  | 1.392566721  | -9.535621969  |
| H | 9.848710157  | 3.815331744  | -10.596431199 |
| H | 9.537807830  | 3.551511106  | -8.889413542  |
| H | 7.742536692  | 4.591016409  | -10.926339732 |
| H | 5.640395562  | 5.139266418  | -10.395140818 |
| H | 4.897827947  | 4.424175581  | -9.028949725  |
| H | 7.715228938  | 2.743411105  | -7.897039453  |
| H | 6.082748757  | 3.172945084  | -7.578382102  |
| H | 5.940755698  | -4.022585404 | 6.323985157   |

**Cartesian coordinates of the optimized Fe1·Fe2·Fe3·Fe4·state wild-type 4Fe-4S quantum cluster in chain-B.**

## 250 atoms

|    |              |              |              |
|----|--------------|--------------|--------------|
| Fe | 19.396986524 | 67.098967432 | 56.308529360 |
| Fe | 17.491248673 | 65.134308275 | 56.458016892 |
| Fe | 19.860088525 | 64.718218139 | 55.162330743 |
| Fe | 17.947835850 | 66.361463918 | 54.119847136 |
| S  | 17.748790882 | 64.089553997 | 54.485618459 |
| S  | 20.186105800 | 66.821240370 | 54.263555910 |
| S  | 17.106275331 | 67.301134090 | 55.914209267 |
| S  | 19.640578559 | 65.036720377 | 57.306009251 |
| S  | 15.705038845 | 64.723061435 | 57.835590561 |
| C  | 15.187628311 | 66.287429310 | 58.662006741 |
| S  | 20.546738678 | 68.741982740 | 57.442095716 |
| C  | 19.950291474 | 68.964543351 | 59.169319863 |
| S  | 21.545425264 | 63.383797719 | 54.373596091 |
| C  | 21.016767824 | 63.084584721 | 52.654975810 |
| S  | 17.185530524 | 67.155427901 | 52.149731675 |
| C  | 18.563313865 | 67.178537028 | 50.949742155 |
| H  | 15.401924271 | 67.112450703 | 57.983973318 |
| H  | 14.097840315 | 66.226040468 | 58.774929012 |
| H  | 20.813394426 | 69.331817107 | 59.732089410 |
| H  | 19.200518618 | 69.763069450 | 59.186622107 |
| H  | 20.543256168 | 62.098157312 | 52.610310241 |
| H  | 20.255748471 | 63.823295137 | 52.400140163 |
| H  | 18.936826763 | 68.197583141 | 50.863881769 |
| H  | 19.390184996 | 66.555090194 | 51.298879912 |
| C  | 24.644002000 | 76.620997000 | 48.376996000 |
| C  | 24.845930179 | 75.376409984 | 49.210413132 |
| N  | 26.269407614 | 75.163829772 | 49.449448202 |
| C  | 26.794123151 | 74.277507187 | 50.290095587 |
| N  | 28.117585890 | 74.089232722 | 50.311037580 |
| N  | 26.020689515 | 73.572117499 | 51.119631307 |
| H  | 25.141612000 | 76.554791000 | 47.403845000 |
| C  | 21.415000000 | 71.340996000 | 47.975999000 |
| C  | 20.194111459 | 72.135296907 | 48.397864541 |
| O  | 20.121338576 | 73.363447142 | 48.214689961 |
| C  | 22.650295227 | 71.697081896 | 48.805287323 |
| C  | 23.944641029 | 71.070145353 | 48.285561440 |
| C  | 24.030438443 | 69.548299219 | 48.385920270 |
| N  | 23.916835743 | 69.056605444 | 49.758566157 |
| C  | 24.880950323 | 69.126685637 | 50.681964258 |
| N  | 24.552019493 | 68.822580444 | 51.960672980 |
| N  | 26.113629246 | 69.473695689 | 50.372639712 |
| H  | 21.618741000 | 71.609153000 | 46.934074000 |
| N  | 19.217146883 | 71.415462385 | 48.977583760 |
| C  | 17.991000000 | 71.973996000 | 49.510998000 |
| C  | 18.151813509 | 72.662023593 | 50.876927515 |
| C  | 18.922565079 | 71.854839761 | 51.864350043 |
| C  | 18.614773893 | 70.589553441 | 52.288524132 |

|   |              |              |              |
|---|--------------|--------------|--------------|
| C | 20.177763167 | 72.187068369 | 52.464621182 |
| N | 19.607035928 | 70.115101389 | 53.106398602 |
| C | 20.579729877 | 71.065293386 | 53.237449935 |
| C | 21.001100836 | 73.321651051 | 52.447823218 |
| C | 21.764522518 | 71.049843176 | 53.967609294 |
| C | 22.175539535 | 73.311847512 | 53.182129798 |
| C | 22.556326836 | 72.185370673 | 53.932151753 |
| H | 17.633684000 | 72.744707000 | 48.820090000 |
| C | 15.701382029 | 70.892953061 | 56.288805692 |
| C | 16.053536848 | 70.966667924 | 57.766042366 |
| O | 16.252781943 | 69.942471805 | 58.434933890 |
| C | 16.950896225 | 70.820873427 | 55.391592375 |
| C | 17.875906551 | 71.975016768 | 55.496220045 |
| N | 17.653274222 | 73.209609703 | 54.921005235 |
| C | 19.070772952 | 72.086060419 | 56.143637874 |
| C | 18.660865591 | 74.036265692 | 55.187964230 |
| N | 19.524933619 | 73.361415676 | 55.935571129 |
| H | 15.078911000 | 71.721456000 | 55.939197000 |
| N | 16.167657421 | 72.194485066 | 58.307868137 |
| H | 16.562673000 | 72.275889000 | 59.244499000 |
| N | 19.519478233 | 63.813261328 | 62.721583918 |
| C | 20.351869421 | 62.825875435 | 62.071257347 |
| C | 21.806877271 | 63.280168505 | 61.855563201 |
| O | 22.696658769 | 62.420223558 | 61.770966662 |
| C | 19.759116140 | 62.454787028 | 60.711330601 |
| C | 18.382648588 | 61.796282376 | 60.756924706 |
| C | 17.844573193 | 61.691352764 | 59.330999065 |
| N | 16.534778938 | 61.058375909 | 59.226958123 |
| C | 16.288781970 | 59.753229927 | 59.164526764 |
| N | 15.017292526 | 59.337941490 | 59.009201601 |
| N | 17.266109416 | 58.854707009 | 59.229946030 |
| C | 19.374936036 | 63.925411899 | 64.050326600 |
| O | 19.937676049 | 63.236059925 | 64.908847909 |
| H | 18.677061000 | 64.732842000 | 64.291576000 |
| N | 22.005157589 | 64.599352565 | 61.692091827 |
| C | 23.289001000 | 65.171998000 | 61.339999000 |
| C | 23.264095182 | 66.029566290 | 60.079461871 |
| C | 24.672364252 | 66.293794464 | 59.546393651 |
| C | 24.690562726 | 67.205985668 | 58.314685427 |
| C | 24.510292807 | 68.671315453 | 58.682927025 |
| N | 24.035258723 | 69.471110984 | 57.506494364 |
| H | 23.715284000 | 65.719872000 | 62.186842000 |
| C | 22.360184129 | 60.395788286 | 58.494271392 |
| C | 21.387038063 | 59.245191518 | 58.382256246 |
| O | 20.249697795 | 59.305704842 | 58.877241851 |
| C | 22.129997260 | 61.509961392 | 57.482898780 |
| O | 22.213666694 | 60.895501450 | 56.185404259 |
| C | 23.184562672 | 62.594564831 | 57.659369117 |
| H | 23.378128000 | 60.073913000 | 58.312270000 |



|   |              |              |              |
|---|--------------|--------------|--------------|
| N | 21.825670346 | 58.151095947 | 57.739198965 |
| H | 21.170100000 | 57.394186000 | 57.563113000 |
| C | 15.761842550 | 66.580745229 | 60.053453633 |
| C | 17.268419745 | 66.551507956 | 60.236933389 |
| H | 15.420306000 | 67.594068000 | 60.325163000 |
| O | 17.829993240 | 65.679613919 | 60.912921138 |
| N | 17.959628369 | 67.587740468 | 59.698131676 |
| C | 19.391255849 | 67.729973609 | 59.900144499 |
| C | 19.778271831 | 67.856211768 | 61.375452974 |
| O | 20.854905477 | 67.404520461 | 61.783494877 |
| N | 18.970037379 | 68.576270784 | 62.161668400 |
| H | 19.238078000 | 68.583743000 | 63.137216000 |
| N | 17.906977406 | 65.286498694 | 49.557053890 |
| C | 18.116917951 | 66.714469250 | 49.563900818 |
| C | 19.123272949 | 67.223614643 | 48.526606310 |
| O | 19.308887271 | 68.443360538 | 48.417378403 |
| N | 19.753945808 | 66.295335142 | 47.801817296 |
| C | 20.853000000 | 66.607000000 | 46.924000000 |
| C | 22.140884764 | 63.162679876 | 51.610917956 |
| C | 21.419697368 | 63.005104960 | 50.294948831 |
| O | 20.972542621 | 63.983919272 | 49.672924569 |
| H | 22.652465000 | 64.135944000 | 51.642252000 |
| N | 21.165454838 | 61.746403988 | 49.902273878 |
| H | 20.434047000 | 61.601916000 | 49.210267000 |
| S | 26.544787925 | 70.950791719 | 55.146700609 |
| O | 26.726606507 | 71.545774616 | 56.479295352 |
| O | 25.901168095 | 71.823329495 | 54.164334480 |
| O | 25.983430166 | 69.581027396 | 55.191159816 |
| P | 28.547583783 | 70.758736253 | 53.004917751 |
| O | 28.023532330 | 69.493652753 | 52.371179532 |
| O | 28.284174150 | 72.106810480 | 52.394809915 |
| O | 28.136794439 | 70.768161188 | 54.635858380 |
| O | 30.170053174 | 70.711621912 | 53.201117709 |
| C | 30.911761898 | 69.485352408 | 53.369332931 |
| C | 31.969981316 | 69.725471261 | 54.432471172 |
| O | 31.406734743 | 69.626582660 | 55.778516284 |
| C | 33.140375064 | 68.758910110 | 54.415007444 |
| O | 34.283600077 | 69.419688374 | 54.966319742 |
| C | 32.649455837 | 67.651938499 | 55.334617488 |
| O | 33.726284211 | 66.892364179 | 55.845494444 |
| C | 31.857351143 | 68.444452601 | 56.393549908 |
| N | 30.703432600 | 67.665164372 | 56.891911440 |
| C | 29.383293175 | 68.028763525 | 56.992291950 |
| N | 28.621811305 | 67.097255057 | 57.533295250 |
| C | 29.499822196 | 66.070766826 | 57.811560899 |
| C | 29.332066736 | 64.787718190 | 58.365773086 |
| N | 28.130329118 | 64.297296079 | 58.715226309 |
| N | 30.418666028 | 64.000620802 | 58.512573737 |
| C | 31.608709721 | 64.456627933 | 58.101803761 |

|   |              |              |              |
|---|--------------|--------------|--------------|
| N | 31.889922395 | 65.638118864 | 57.544144527 |
| C | 30.794797136 | 66.406751493 | 57.427613956 |
| H | 15.356828236 | 65.875885599 | 60.784356066 |
| H | 18.951314708 | 64.429253705 | 62.142119536 |
| H | 17.461095080 | 68.302341531 | 59.175310440 |
| H | 19.899958956 | 66.831975741 | 59.551252763 |
| H | 17.165024398 | 67.186999427 | 49.303297611 |
| H | 19.530107036 | 65.320398972 | 47.970100477 |
| H | 22.874246697 | 62.365506911 | 51.771045730 |
| H | 21.426521526 | 60.954370555 | 50.478640230 |
| H | 23.008073127 | 63.424926555 | 56.972053224 |
| H | 23.163693224 | 62.984817961 | 58.679482855 |
| H | 24.181738242 | 62.181183398 | 57.461473545 |
| H | 21.968711641 | 61.601946812 | 55.533693151 |
| H | 21.130365235 | 61.938668466 | 57.617904305 |
| H | 22.306822217 | 60.789883283 | 59.511038640 |
| H | 22.717001954 | 58.139265253 | 57.257543586 |
| H | 17.035761064 | 57.870843876 | 59.140913759 |
| H | 18.240873223 | 59.103091744 | 59.082678620 |
| H | 14.832225627 | 58.351101358 | 59.164523184 |
| H | 14.279828693 | 59.955168342 | 59.340808228 |
| H | 15.739731549 | 61.676884093 | 59.097041544 |
| H | 18.551354180 | 61.170457986 | 58.682476010 |
| H | 17.714592346 | 62.694138844 | 58.925173680 |
| H | 18.458949104 | 60.804248182 | 61.217909919 |
| H | 17.678800989 | 62.387721488 | 61.352947257 |
| H | 19.715911835 | 63.361171199 | 60.098389412 |
| H | 20.456346620 | 61.772066618 | 60.227135789 |
| H | 20.407025551 | 61.943768765 | 62.716598153 |
| H | 21.236772458 | 65.249154683 | 61.826712866 |
| H | 23.956355311 | 64.320537949 | 61.179718639 |
| H | 22.685461103 | 65.508508706 | 59.309435021 |
| H | 22.743903890 | 66.964547820 | 60.289004881 |
| H | 25.308663239 | 66.721027277 | 60.334274488 |
| H | 25.121090787 | 65.333138877 | 59.267159221 |
| H | 25.638868012 | 67.091732914 | 57.776024049 |
| H | 23.889670693 | 66.891762897 | 57.631682888 |
| H | 23.757982330 | 68.820104042 | 59.458990847 |
| H | 25.446889576 | 69.125360991 | 59.017715763 |
| H | 24.021247063 | 70.471594862 | 57.742511149 |
| H | 24.659661568 | 69.366958544 | 56.681648254 |
| H | 23.646187853 | 69.159519311 | 52.272251711 |
| H | 25.282431591 | 68.937147847 | 52.660121501 |
| H | 26.839424909 | 69.548712962 | 51.111071418 |
| H | 26.425818208 | 69.409607658 | 49.411215452 |
| H | 23.130777797 | 68.452301149 | 49.972623549 |
| H | 23.220953037 | 69.072250304 | 47.833200861 |
| H | 24.961298260 | 69.190020495 | 47.931076124 |
| H | 24.085129434 | 71.327487974 | 47.226257964 |

|   |              |              |              |
|---|--------------|--------------|--------------|
| H | 24.789247107 | 71.507344509 | 48.829815815 |
| H | 22.765427115 | 72.785086781 | 48.780704504 |
| H | 22.487689171 | 71.426479221 | 49.855951939 |
| H | 21.203761866 | 70.270259632 | 48.011784871 |
| H | 19.341735684 | 70.411478332 | 49.043383110 |
| H | 17.254408119 | 71.167319764 | 49.560648175 |
| H | 18.656112687 | 73.619726567 | 50.722171629 |
| H | 17.140616146 | 72.893416620 | 51.241536479 |
| H | 20.725284767 | 74.198549159 | 51.869187242 |
| H | 22.818993571 | 74.188850014 | 53.183178092 |
| H | 23.494806359 | 72.199264229 | 54.470440676 |
| H | 22.044474977 | 70.182473203 | 54.555351173 |
| H | 19.617667752 | 69.197341719 | 53.534022542 |
| H | 17.756918822 | 69.971582197 | 52.074894962 |
| H | 20.400753710 | 73.741304636 | 56.285022328 |
| H | 18.756981064 | 75.056426819 | 54.855962395 |
| H | 16.855589088 | 73.464094381 | 54.344319946 |
| H | 19.631872289 | 71.355360378 | 56.702566178 |
| H | 17.515528934 | 69.923627306 | 55.635131238 |
| H | 16.608711952 | 70.719047961 | 54.356331631 |
| H | 15.131598887 | 69.971496378 | 56.140459758 |
| H | 16.080821875 | 73.038109146 | 57.754236138 |
| H | 33.311004617 | 66.283923190 | 56.517684310 |
| H | 34.796255456 | 68.720389754 | 55.422860755 |
| H | 28.093392159 | 63.445710540 | 59.264289741 |
| H | 27.347105479 | 64.930556348 | 58.775030051 |
| H | 32.449592476 | 63.781509095 | 58.239793493 |
| H | 29.040975660 | 68.987677694 | 56.637158106 |
| H | 30.251577101 | 68.657959605 | 53.639567481 |
| H | 31.399138217 | 69.260421163 | 52.412622769 |
| H | 26.484340464 | 72.976251121 | 51.807877723 |
| H | 25.090212443 | 73.904096154 | 51.341727364 |
| H | 28.472525127 | 73.349085849 | 50.919988038 |
| H | 28.657717887 | 74.318591572 | 49.486804593 |
| H | 26.918920039 | 75.644053045 | 48.834413259 |
| H | 24.335856646 | 75.506877489 | 50.171118487 |
| H | 24.427581901 | 74.502531778 | 48.700510842 |
| H | 23.571378959 | 76.760972567 | 48.197883528 |
| H | 25.021611851 | 77.502562817 | 48.906516013 |
| H | 32.479176181 | 68.684317196 | 57.265515186 |
| H | 32.341042763 | 70.751559692 | 54.328395847 |
| H | 18.007694338 | 68.774544391 | 61.916544553 |
| C | 16.838216594 | 64.670137276 | 49.021342256 |
| O | 15.946914982 | 65.209684662 | 48.360524830 |
| H | 16.849535000 | 63.603479000 | 49.253523000 |
| O | 22.483155038 | 66.155241398 | 48.716781014 |
| C | 22.147720413 | 65.901909795 | 47.348931113 |
| H | 22.982507000 | 66.274602000 | 46.742711000 |
| H | 18.555141174 | 64.704994599 | 50.082679478 |

|   |              |              |              |
|---|--------------|--------------|--------------|
| H | 21.978260652 | 65.485264567 | 49.231225244 |
| H | 20.601667000 | 66.337714000 | 45.892815000 |
| H | 20.989612330 | 67.688249151 | 46.959665998 |
| H | 22.059246237 | 64.822055920 | 47.173568752 |
| H | 33.363738234 | 68.382795240 | 53.410059769 |
| H | 31.945659303 | 67.018323545 | 54.774408759 |
| H | 23.061204346 | 69.198900309 | 57.272926054 |

**Cartesian coordinates of the optimized Fe1·Fe2·Fe3·Fe4 state no-tandem 4Fe-4S quantum cluster model in chain-A.**

211 atoms

|    |              |              |              |
|----|--------------|--------------|--------------|
| Fe | -0.054305588 | 0.187557929  | -0.074383955 |
| Fe | -0.233227045 | 0.069135846  | 2.597468994  |
| Fe | 2.252523730  | 0.164000675  | 1.412340746  |
| Fe | 0.746584959  | -2.039967749 | 1.144084076  |
| S  | 1.598885362  | -1.324948891 | 3.062351120  |
| S  | 1.938094773  | -0.929528652 | -0.515173723 |
| S  | -1.433257776 | -1.210288992 | 1.183730111  |
| S  | 0.567148204  | 1.784602845  | 1.318654212  |
| S  | -1.360304293 | 1.063956262  | 4.341706409  |
| S  | 4.441290543  | 0.775711068  | 1.577998432  |
| S  | 0.878305799  | -4.242168134 | 0.499432685  |
| S  | -0.975799392 | 0.960741198  | -2.020526024 |
| N  | 2.800264022  | -1.131090654 | 8.352587838  |
| C  | 2.605261795  | -2.523300186 | 8.017308721  |
| C  | 3.864941677  | -3.214278324 | 7.462973284  |
| N  | 4.760765971  | -2.426110808 | 6.838356325  |
| O  | 3.957259539  | -4.445559496 | 7.556356601  |
| C  | 1.473685136  | -2.665891924 | 7.000232026  |
| C  | 0.103447518  | -2.191291774 | 7.478614305  |
| C  | -0.883608505 | -2.244268925 | 6.312794986  |
| N  | -2.196354629 | -1.697693831 | 6.625129800  |
| C  | -3.251783510 | -2.358867188 | 7.088988779  |
| N  | -3.193075815 | -3.655219219 | 7.389087098  |
| N  | -4.413754961 | -1.701918608 | 7.243152894  |
| H  | 2.352590945  | -3.059877539 | 8.937229149  |
| H  | 1.411829735  | -3.721651484 | 6.739634140  |
| H  | 1.758572637  | -2.130534481 | 6.086746094  |
| H  | 0.147418516  | -1.161416286 | 7.852276123  |
| H  | -0.243108255 | -2.822495497 | 8.306009588  |
| H  | -0.990344754 | -3.262435788 | 5.937776339  |
| H  | -0.503861636 | -1.637267751 | 5.491269253  |
| H  | -2.324976845 | -0.710974308 | 6.418538100  |
| H  | -2.434794512 | -4.244023119 | 7.056186479  |

|   |              |              |              |
|---|--------------|--------------|--------------|
| H | -4.059262356 | -4.135323602 | 7.610317374  |
| H | -4.382023111 | -0.689679241 | 7.314527410  |
| H | -5.127747885 | -2.144382235 | 7.813132591  |
| H | 2.493616736  | -0.423185129 | 7.693025133  |
| C | 5.977111000  | -2.929905000 | 6.238906000  |
| H | 6.869350000  | -2.636804000 | 6.801956000  |
| C | 1.983263985  | 5.099406029  | 0.567105016  |
| H | 1.743299000  | 6.022431000  | 0.036064000  |
| C | 2.665096262  | 5.362945301  | 1.893812130  |
| O | 2.484141005  | 4.641167620  | 2.882507578  |
| C | 2.781562359  | 4.160311977  | -0.355094907 |
| C | 4.155481572  | 4.581335179  | -0.726722725 |
| N | 4.456991754  | 5.632523761  | -1.570674723 |
| C | 5.773797879  | 5.735452727  | -1.736388270 |
| N | 6.328585657  | 4.771951407  | -1.012229410 |
| C | 5.358403055  | 4.041815753  | -0.377543282 |
| H | 1.036450325  | 4.603373820  | 0.787541904  |
| H | 2.196993128  | 4.021123565  | -1.269198809 |
| H | 2.870340739  | 3.186970221  | 0.123525515  |
| H | 3.785488240  | 6.241237752  | -2.031955702 |
| H | 5.587184232  | 3.192464417  | 0.242772236  |
| H | 6.290230564  | 6.463240845  | -2.340692498 |
| H | 7.330851456  | 4.616438419  | -0.934006958 |
| N | 1.856379490  | 2.444910916  | -6.989848484 |
| C | 1.539952000  | 3.763439000  | -6.462626000 |
| H | 1.476316000  | 4.465198000  | -7.300785000 |
| C | -0.169694739 | 3.103937559  | 5.941767704  |
| H | 0.090269947  | 4.171509837  | 5.993627562  |
| N | 2.879477152  | 1.977430652  | 4.429586025  |
| C | -0.842322451 | 2.827025200  | 4.604188971  |
| H | -0.828418444 | 2.871841652  | 6.785436477  |
| H | -1.753725390 | 3.430185630  | 4.511967292  |
| H | -0.176058591 | 3.105140015  | 3.787277472  |
| C | 4.123943506  | 1.224796361  | 4.414396097  |
| C | 4.959892501  | 1.514656233  | 5.676942832  |
| N | 4.738762462  | 2.715986493  | 6.230416966  |
| O | 5.792384059  | 0.697969768  | 6.102233149  |
| H | 2.831354014  | 2.664971600  | 3.679491950  |
| C | 4.999731091  | 1.496334487  | 3.183248747  |
| H | 3.915577662  | 0.152792081  | 4.451852178  |
| H | 5.092025273  | 2.582435122  | 3.057340726  |
| H | 6.005014614  | 1.099014206  | 3.359471668  |
| H | 5.186885107  | 2.962073568  | 7.108268522  |
| C | -0.092483957 | -5.307275203 | -1.930785919 |
| C | -1.131084440 | -5.067184910 | -2.997561423 |
| H | 0.901281896  | -5.201978921 | -2.376172110 |
| N | -2.233625343 | -5.824998279 | -2.930413994 |
| O | -1.012035305 | -4.154914810 | -3.834274992 |
| C | -0.326010410 | -4.219279522 | -0.878781451 |

|   |              |              |              |
|---|--------------|--------------|--------------|
| H | -0.184907014 | -6.306000568 | -1.492576735 |
| H | -0.258713340 | -3.249554942 | -1.372668268 |
| H | -1.335104447 | -4.317166675 | -0.463725511 |
| H | -3.034078000 | -5.540736000 | -3.483256000 |
| N | -2.442820433 | -1.116899780 | -4.084999374 |
| C | -1.387261474 | -0.239873411 | -4.527390682 |
| C | -0.670922629 | -0.710182532 | -5.802881582 |
| N | -0.975702459 | -1.935081649 | -6.242808980 |
| O | 0.160289872  | 0.036638998  | -6.334700589 |
| C | -0.350215916 | -0.058854586 | -3.415463146 |
| H | -1.841924425 | 0.722133377  | -4.779965034 |
| H | -0.034948465 | -1.042094907 | -3.055348923 |
| H | 0.522381101  | 0.425052359  | -3.851816115 |
| C | -0.358249000 | -2.570636000 | -7.389921000 |
| H | -1.111310000 | -2.639926000 | -8.181831000 |
| C | 1.001816669  | -6.171714610 | 5.264340215  |
| C | -0.390449592 | -6.385474176 | 5.799349139  |
| H | 1.466690000  | -7.130947000 | 5.085306000  |
| N | -0.966124065 | -7.538634200 | 5.428219567  |
| O | -0.950638867 | -5.580500281 | 6.562494761  |
| C | 1.111689642  | -5.429915583 | 3.935748650  |
| O | 0.139375143  | -5.984605754 | 3.036609199  |
| C | 2.527117964  | -5.609862914 | 3.408145408  |
| H | 1.592709080  | -5.659187648 | 6.023774534  |
| H | 0.896947096  | -4.365276385 | 4.082443178  |
| H | 0.238152666  | -5.469377808 | 2.192563083  |
| H | 2.707884080  | -4.988002190 | 2.531365550  |
| H | 2.681063738  | -6.661056010 | 3.133105567  |
| H | 3.256247365  | -5.343459583 | 4.175067202  |
| H | -1.938788000 | -7.684524000 | 5.661722000  |
| C | 3.080778000  | 0.711404000  | -8.141230000 |
| H | 3.027971000  | 0.637569000  | -9.232461000 |
| C | 2.910753663  | 2.171416163  | -7.770561531 |
| O | 3.703910707  | 3.046463313  | -8.173942581 |
| C | 4.463336007  | 0.172338378  | -7.742061871 |
| C | 4.667614770  | -1.306865921 | -8.086138982 |
| C | 4.080541286  | -2.297048351 | -7.082890464 |
| N | 4.766138077  | -2.277117946 | -5.787745602 |
| C | 5.892582456  | -2.916874443 | -5.473571011 |
| N | 6.516861987  | -2.588197876 | -4.323185835 |
| N | 6.382229487  | -3.880183800 | -6.239277799 |
| H | 2.278288409  | 0.107688748  | -7.717228601 |
| H | 4.646909220  | 0.350457159  | -6.675032616 |
| H | 5.215519080  | 0.751889046  | -8.286070327 |
| H | 5.741321934  | -1.513205031 | -8.179448589 |
| H | 4.222330816  | -1.525550372 | -9.066381426 |
| H | 4.107625516  | -3.313775867 | -7.483359521 |
| H | 3.031697137  | -2.091276479 | -6.864166393 |
| H | 4.435961278  | -1.609396997 | -5.100100131 |

|   |              |              |               |
|---|--------------|--------------|---------------|
| H | 6.506485156  | -1.604552792 | -4.073254015  |
| H | 7.410957834  | -3.040174926 | -4.151842549  |
| H | 5.808798227  | -4.341745508 | -6.935070565  |
| H | 7.235088097  | -4.353364278 | -5.960898886  |
| N | 3.506989762  | 6.412083899  | 1.935009596   |
| H | 4.046672000  | 6.552931000  | 2.783093000   |
| C | 6.213249472  | -2.566414694 | 4.772534741   |
| C | 5.312443095  | -3.323447256 | 3.803558074   |
| C | 5.569018020  | -3.045755981 | 2.320845505   |
| C | 6.874198354  | -3.631393488 | 1.819833899   |
| N | 7.039142806  | -3.346703534 | 0.357322321   |
| C | 2.575211531  | 4.284372928  | -5.441427451  |
| C | 2.964231093  | 3.273883379  | -4.405191006  |
| C | 2.102590481  | 2.628879446  | -3.553969355  |
| N | 2.776333914  | 1.687638206  | -2.820537996  |
| C | 4.097644078  | 1.704098238  | -3.165089167  |
| C | 4.258270387  | 2.703438266  | -4.163454790  |
| C | 5.159701851  | 0.940451204  | -2.684313814  |
| C | 6.418000523  | 1.187062228  | -3.210858547  |
| C | 6.610305499  | 2.180862560  | -4.189036079  |
| C | 5.549543361  | 2.938106589  | -4.660031642  |
| C | 0.156488114  | -3.975671414 | -7.041520453  |
| H | 0.736896000  | -4.386578000 | -7.879897000  |
| O | 1.030898201  | -3.981667103 | -5.911460272  |
| C | -3.755649323 | -0.825623575 | -4.102669684  |
| O | -4.277123230 | 0.176697755  | -4.598652146  |
| H | -4.321424000 | -1.617049000 | -3.604721000  |
| C | 3.217636837  | -0.684748171 | 9.552516474   |
| O | 3.546011118  | -1.388947740 | 10.508668972  |
| H | 3.237939000  | 0.408881000  | 9.561120000   |
| N | 5.710472249  | 4.793739343  | -9.601616052  |
| C | 6.798316424  | 4.065509779  | -9.309430110  |
| N | 6.813878952  | 3.399646174  | -8.145294241  |
| N | 7.857025494  | 4.086939684  | -10.106308754 |
| C | 9.109012949  | 3.360773319  | -9.889356273  |
| C | 9.027971000  | 1.861263000  | -10.151451000 |
| H | 8.816379000  | 1.617661000  | -11.197832000 |
| H | 4.659694433  | -1.417762731 | 6.900014619   |
| H | 1.285725365  | 1.665828090  | -6.674772885  |
| H | 3.897611597  | 3.209829694  | 5.944268955   |
| H | -2.376460773 | -6.496188550 | -2.184397395  |
| H | -1.735717362 | -2.427358766 | -5.785691864  |
| H | -0.554065312 | -8.128515625 | 4.715323569   |
| H | 3.661730968  | 7.024748032  | 1.144876878   |
| H | 7.265667518  | -2.811486471 | 4.579080900   |
| H | 6.110801146  | -1.485115746 | 4.637200150   |
| H | 4.270874043  | -3.064078886 | 4.006965574   |
| H | 5.414047568  | -4.400556877 | 3.988030482   |
| H | 5.548222310  | -1.965355165 | 2.137863756   |

|   |              |              |               |
|---|--------------|--------------|---------------|
| H | 4.746779806  | -3.479796176 | 1.737786036   |
| H | 6.906484726  | -4.719847418 | 1.920285881   |
| H | 7.751541081  | -3.198450684 | 2.303599634   |
| H | 7.925166101  | -3.726670093 | -0.000191396  |
| H | 7.049456479  | -2.334834731 | 0.181357525   |
| H | 6.281037058  | -3.770537822 | -0.192134324  |
| H | 0.550921920  | 3.688359502  | -6.002791220  |
| H | 2.143952725  | 5.183054892  | -4.977848634  |
| H | 3.466774344  | 4.607474650  | -5.983133155  |
| H | 1.041786695  | 2.764565926  | -3.407352935  |
| H | 2.366531188  | 1.095026669  | -2.107216664  |
| H | 5.005112216  | 0.203402874  | -1.903974239  |
| H | 7.274351047  | 0.624830526  | -2.844609610  |
| H | 7.613240190  | 2.361582755  | -4.568373773  |
| H | 5.725721241  | 3.720188463  | -5.390602650  |
| H | -2.173323516 | -1.964064780 | -3.591123245  |
| H | 0.451754322  | -1.925026171 | -7.726906889  |
| H | -0.698267513 | -4.643861903 | -6.867091615  |
| H | 0.451554033  | -3.958306640 | -5.119466007  |
| H | 9.998577632  | 1.419762272  | -9.897226239  |
| H | 8.268654482  | 1.371700425  | -9.534406515  |
| H | 9.835978643  | 3.826751686  | -10.559834336 |
| H | 9.455173570  | 3.558951340  | -8.867987605  |
| H | 7.768548159  | 4.627674356  | -10.962250495 |
| H | 5.619723858  | 5.152148882  | -10.546743854 |
| H | 4.837998545  | 4.502964206  | -9.164508343  |
| H | 7.565385544  | 2.751708154  | -7.953068903  |
| H | 5.908642553  | 3.166250331  | -7.748524232  |
| H | 5.927193536  | -4.020124188 | 6.325910432   |
| H | 0.757080428  | 2.534928354  | 6.043702636   |
| H | 2.091114258  | 1.351279616  | 4.305134025   |

**Cartesian coordinates of the optimized Fe1·Fe2·Fe3·Fe4 state no-tandem 4Fe-4S quantum cluster model in chain-B.**

250 atoms

|    |              |              |              |
|----|--------------|--------------|--------------|
| Fe | 19.456112321 | 67.170510792 | 56.435488094 |
| Fe | 17.468860469 | 65.170955277 | 56.453879129 |
| Fe | 19.901278452 | 64.776935263 | 55.267920603 |
| Fe | 18.041597871 | 66.417142105 | 54.187823400 |
| S  | 17.832380510 | 64.137391636 | 54.497964333 |
| S  | 20.280209298 | 66.880441540 | 54.396663481 |
| S  | 17.185539923 | 67.373512771 | 55.973542990 |
| S  | 19.563126340 | 65.092297317 | 57.428882544 |
| S  | 15.669434913 | 64.523085737 | 57.696080082 |



|   |              |              |              |
|---|--------------|--------------|--------------|
| C | 14.835102764 | 65.899928761 | 58.606509228 |
| S | 20.637231300 | 68.830715680 | 57.551842384 |
| C | 20.250436524 | 69.064739264 | 59.344382839 |
| S | 21.535699484 | 63.421780399 | 54.400667331 |
| C | 20.997922644 | 63.125223015 | 52.679741971 |
| S | 17.249937591 | 67.131883171 | 52.198271664 |
| C | 18.587456729 | 67.159436798 | 50.946768512 |
| H | 15.227685202 | 66.849105855 | 58.236299600 |
| H | 13.777163766 | 65.844245299 | 58.323611989 |
| H | 21.200302947 | 69.275315237 | 59.845345863 |
| H | 19.627147836 | 69.963948759 | 59.437102114 |
| H | 20.511607934 | 62.144058098 | 52.643037734 |
| H | 20.247385072 | 63.873524158 | 52.424014663 |
| H | 18.973037052 | 68.175663917 | 50.866733990 |
| H | 19.416044698 | 66.516878290 | 51.257608774 |
| C | 24.644002000 | 76.620996000 | 48.376995000 |
| C | 24.830976692 | 75.368758120 | 49.200860005 |
| N | 26.253059585 | 75.145968850 | 49.436612080 |
| C | 26.769430877 | 74.226759700 | 50.246813202 |
| N | 28.086889616 | 74.014741892 | 50.252915487 |
| N | 25.984422689 | 73.504573794 | 51.055271542 |
| H | 25.141612000 | 76.554789000 | 47.403844000 |
| C | 21.415000000 | 71.340996000 | 47.975999000 |
| C | 20.197436723 | 72.138310005 | 48.400217860 |
| O | 20.127545323 | 73.367684123 | 48.220180856 |
| C | 22.651803670 | 71.684202558 | 48.807855657 |
| C | 23.937421076 | 71.032259295 | 48.297336416 |
| C | 23.997283298 | 69.511342881 | 48.425813852 |
| N | 23.881224712 | 69.049501357 | 49.807753478 |
| C | 24.852334917 | 69.105841972 | 50.723577372 |
| N | 24.525425630 | 68.823866651 | 52.008227691 |
| N | 26.090556857 | 69.417034819 | 50.401997061 |
| H | 21.618741000 | 71.609153000 | 46.934074000 |
| N | 19.219848889 | 71.417870003 | 48.978510811 |
| C | 17.991000000 | 71.973996000 | 49.510998000 |
| C | 18.144828081 | 72.655003789 | 50.880881235 |
| C | 18.913574235 | 71.840508854 | 51.863403306 |
| C | 18.600512122 | 70.573108725 | 52.276941519 |
| C | 20.173472544 | 72.159414687 | 52.461036344 |
| N | 19.594624635 | 70.084770066 | 53.084246569 |
| C | 20.572358690 | 71.028194911 | 53.221605886 |
| C | 21.002905597 | 73.289923324 | 52.453557621 |
| C | 21.759217479 | 70.998398579 | 53.948078390 |
| C | 22.179840443 | 73.266318869 | 53.183712833 |
| C | 22.558401295 | 72.129614896 | 53.920267100 |
| H | 17.633684000 | 72.744706000 | 48.820090000 |
| C | 15.680715526 | 70.883580470 | 56.291553002 |
| C | 16.011006914 | 70.961807766 | 57.773698082 |
| O | 16.122887853 | 69.938520940 | 58.460325539 |

|   |              |              |              |
|---|--------------|--------------|--------------|
| C | 16.922812190 | 70.791275159 | 55.388877122 |
| C | 17.867745637 | 71.928103608 | 55.484096195 |
| N | 17.662168484 | 73.165533081 | 54.909420323 |
| C | 19.071227405 | 72.014960155 | 56.118597449 |
| C | 18.688701733 | 73.972148749 | 55.163555699 |
| N | 19.547010980 | 73.281252995 | 55.903165035 |
| H | 15.078911000 | 71.721456000 | 55.939197000 |
| N | 16.187320837 | 72.193249810 | 58.298261584 |
| H | 16.562673000 | 72.275889000 | 59.244499000 |
| N | 19.510963601 | 63.809786437 | 62.711777051 |
| C | 20.335021542 | 62.824880605 | 62.045714884 |
| C | 21.789038131 | 63.275193136 | 61.811248669 |
| O | 22.657822854 | 62.408756452 | 61.648451451 |
| C | 19.730649297 | 62.461540855 | 60.688383016 |
| C | 18.369065780 | 61.771678861 | 60.727794938 |
| C | 17.853040544 | 61.623383493 | 59.295989123 |
| N | 16.553572645 | 60.971898739 | 59.191611262 |
| C | 16.321841927 | 59.662388560 | 59.130198975 |
| N | 15.054973608 | 59.239838428 | 58.982386565 |
| N | 17.308052040 | 58.773934746 | 59.194461661 |
| C | 19.387833385 | 63.936287005 | 64.047902263 |
| O | 19.993002141 | 63.275100933 | 64.893506487 |
| H | 18.677061000 | 64.732841000 | 64.291576000 |
| N | 22.003092543 | 64.599790284 | 61.705077013 |
| C | 23.289001000 | 65.171998000 | 61.339999000 |
| C | 23.253766529 | 66.027649626 | 60.080806267 |
| C | 24.662386901 | 66.258762308 | 59.529034068 |
| C | 24.692253983 | 67.158561528 | 58.288835681 |
| C | 24.557158354 | 68.629494646 | 58.651069370 |
| N | 24.056991213 | 69.438544304 | 57.493566386 |
| H | 23.715284000 | 65.719872000 | 62.186842000 |
| C | 22.357872828 | 60.395068119 | 58.482014704 |
| C | 21.387531451 | 59.243686462 | 58.369914389 |
| O | 20.246800815 | 59.306856939 | 58.857804701 |
| C | 22.129794648 | 61.505057089 | 57.465500368 |
| O | 22.205572742 | 60.889861080 | 56.168169228 |
| C | 23.189493988 | 62.585112485 | 57.638472904 |
| H | 23.378129000 | 60.073913000 | 58.312270000 |
| N | 21.829276909 | 58.146914452 | 57.736100646 |
| H | 21.170101000 | 57.394186000 | 57.563113000 |
| C | 14.967872766 | 65.827169920 | 60.122778369 |
| H | 14.342282492 | 66.610732638 | 60.575214208 |
| N | 18.126729919 | 67.799583738 | 59.745536044 |
| C | 19.546015423 | 67.904579323 | 60.056926733 |
| C | 19.779441266 | 68.040816533 | 61.577582677 |
| O | 20.895900943 | 67.827795796 | 62.075882272 |
| N | 18.699626597 | 68.411072054 | 62.278971658 |
| H | 18.739084701 | 68.468973379 | 63.291823715 |
| N | 17.877069479 | 65.299951869 | 49.540549861 |

|   |              |              |              |
|---|--------------|--------------|--------------|
| C | 18.099288330 | 66.725811363 | 49.560577269 |
| C | 19.102047874 | 67.230829851 | 48.512053116 |
| O | 19.278157625 | 68.450716972 | 48.391819023 |
| N | 19.750132907 | 66.301114827 | 47.801645686 |
| C | 20.853000000 | 66.606999000 | 46.924000000 |
| C | 22.118341495 | 63.173598248 | 51.626585547 |
| C | 21.387619647 | 63.015059003 | 50.313587506 |
| O | 20.916440085 | 63.992668518 | 49.706838173 |
| H | 22.652465000 | 64.135944000 | 51.642252000 |
| N | 21.160900645 | 61.756692791 | 49.904883312 |
| H | 20.434046000 | 61.601916000 | 49.210267000 |
| S | 26.573594656 | 70.992773130 | 55.222100805 |
| O | 26.872958723 | 71.379830714 | 56.610938025 |
| O | 25.963577534 | 72.050988013 | 54.411627674 |
| O | 25.888174877 | 69.680606054 | 55.117769936 |
| P | 28.496817793 | 70.699555285 | 52.976510893 |
| O | 27.989254872 | 69.406357423 | 52.387730903 |
| O | 28.189844362 | 72.019260697 | 52.329455069 |
| O | 28.113610466 | 70.745339438 | 54.613738417 |
| O | 30.120181113 | 70.682599503 | 53.159638568 |
| C | 30.873890045 | 69.467895125 | 53.358486133 |
| C | 31.917000008 | 69.724714341 | 54.433940646 |
| O | 31.350126332 | 69.614149736 | 55.777374381 |
| C | 33.099627987 | 68.772705076 | 54.419919706 |
| O | 34.225225188 | 69.450860817 | 54.983468680 |
| C | 32.615389095 | 67.654950354 | 55.331632884 |
| O | 33.696063759 | 66.899907971 | 55.841778713 |
| C | 31.813249769 | 68.434849042 | 56.391012672 |
| N | 30.665695764 | 67.645117964 | 56.886543873 |
| C | 29.342858298 | 67.999688817 | 56.981773468 |
| N | 28.584971559 | 67.060316220 | 57.513881893 |
| C | 29.468702394 | 66.038902686 | 57.793092997 |
| C | 29.304798581 | 64.752682694 | 58.339036767 |
| N | 28.099659040 | 64.249730320 | 58.668194564 |
| N | 30.395316119 | 63.973071911 | 58.493790827 |
| C | 31.584935121 | 64.439728720 | 58.096770102 |
| N | 31.861406444 | 65.624630893 | 57.543889148 |
| C | 30.762901496 | 66.385964949 | 57.419241473 |
| H | 15.998900201 | 66.001017221 | 60.441270803 |
| H | 18.875384018 | 64.368131256 | 62.150847692 |
| H | 17.796242151 | 68.569901127 | 59.166930017 |
| H | 20.059068434 | 66.979047653 | 59.781949995 |
| H | 17.150372977 | 67.216536069 | 49.324954094 |
| H | 19.520210166 | 65.326548637 | 47.964201332 |
| H | 22.838277513 | 62.364478166 | 51.788096137 |
| H | 21.448412749 | 60.962804717 | 50.466662725 |
| H | 23.013539421 | 63.417926757 | 56.954529043 |
| H | 23.176132138 | 62.971692423 | 58.660278388 |
| H | 24.183281257 | 62.167506953 | 57.433072827 |

|   |              |              |              |
|---|--------------|--------------|--------------|
| H | 21.968315487 | 61.602504452 | 55.519777385 |
| H | 21.131969104 | 61.937337108 | 57.601858798 |
| H | 22.296855490 | 60.795129546 | 59.496155816 |
| H | 22.722076751 | 58.131059396 | 57.257012792 |
| H | 17.082953432 | 57.785993039 | 59.138408489 |
| H | 18.282017393 | 59.025203081 | 59.043784049 |
| H | 14.868800464 | 58.248012699 | 59.093224125 |
| H | 14.307699057 | 59.853375033 | 59.292390774 |
| H | 15.756641593 | 61.578805649 | 59.025958828 |
| H | 18.577844926 | 61.095949826 | 58.673980870 |
| H | 17.715448533 | 62.610984277 | 58.856813160 |
| H | 18.465668086 | 60.789531756 | 61.206178498 |
| H | 17.638623195 | 62.347497390 | 61.309153851 |
| H | 19.675020664 | 63.373264519 | 60.081173738 |
| H | 20.438092463 | 61.798797440 | 60.191079583 |
| H | 20.393642805 | 61.937595698 | 62.683958141 |
| H | 21.258464040 | 65.240064158 | 61.958549044 |
| H | 23.949323417 | 64.315194841 | 61.176876079 |
| H | 22.654038070 | 65.517012236 | 59.319658057 |
| H | 22.756984483 | 66.974647772 | 60.301847310 |
| H | 25.315458395 | 66.676675936 | 60.308207885 |
| H | 25.083730343 | 65.283842544 | 59.256091802 |
| H | 25.631185421 | 67.013634780 | 57.741359541 |
| H | 23.876057967 | 66.861150556 | 57.617618344 |
| H | 23.836308899 | 68.794999805 | 59.452949068 |
| H | 25.512952902 | 69.064367468 | 58.955468168 |
| H | 24.044135726 | 70.434230245 | 57.746427888 |
| H | 24.662265224 | 69.353992058 | 56.652416298 |
| H | 23.628966561 | 69.183465429 | 52.320928831 |
| H | 25.260894383 | 68.929436100 | 52.704181431 |
| H | 26.826523514 | 69.472344048 | 51.134218323 |
| H | 26.391188990 | 69.359755110 | 49.436127251 |
| H | 23.070920085 | 68.487768591 | 50.044464627 |
| H | 23.177509128 | 69.039467402 | 47.885330299 |
| H | 24.917726624 | 69.123359355 | 47.973451844 |
| H | 24.080724919 | 71.268758390 | 47.233746171 |
| H | 24.788142556 | 71.466440065 | 48.834874611 |
| H | 22.783667692 | 72.770105456 | 48.778246017 |
| H | 22.480222370 | 71.421983490 | 49.859002137 |
| H | 21.196159411 | 70.271666429 | 48.008129625 |
| H | 19.337595456 | 70.412064169 | 49.031099258 |
| H | 17.256381060 | 71.164883224 | 49.554712318 |
| H | 18.645779260 | 73.615872636 | 50.735060352 |
| H | 17.130714794 | 72.878810833 | 51.242437692 |
| H | 20.728196778 | 74.175166211 | 51.886631026 |
| H | 22.825998702 | 74.141134293 | 53.193090413 |
| H | 23.498938391 | 72.133306725 | 54.456931725 |
| H | 22.034406235 | 70.125065802 | 54.529059470 |
| H | 19.597235084 | 69.167195454 | 53.512509581 |

|   |              |              |              |
|---|--------------|--------------|--------------|
| H | 17.738530380 | 69.961903943 | 52.060429574 |
| H | 20.433586958 | 73.647113439 | 56.239485666 |
| H | 18.800967263 | 74.989926405 | 54.829002318 |
| H | 16.863184238 | 73.431723793 | 54.339924407 |
| H | 19.621625356 | 71.273026520 | 56.675394756 |
| H | 17.475894857 | 69.886292957 | 55.628192895 |
| H | 16.571239873 | 70.691868482 | 54.356615530 |
| H | 15.091491693 | 69.974205057 | 56.144882179 |
| H | 16.172506076 | 73.028655595 | 57.725259067 |
| H | 33.282068591 | 66.279289411 | 56.502594167 |
| H | 34.802820063 | 68.747351870 | 55.348241684 |
| H | 28.071674953 | 63.405097418 | 59.231385823 |
| H | 27.325964922 | 64.892373289 | 58.763133537 |
| H | 32.429577629 | 63.771489822 | 58.243298616 |
| H | 28.995785747 | 68.957914186 | 56.629129742 |
| H | 30.218345634 | 68.637714107 | 53.628388092 |
| H | 31.374677395 | 69.237613067 | 52.411725890 |
| H | 26.456225200 | 72.902622354 | 51.734094430 |
| H | 25.089760187 | 73.887203658 | 51.332326799 |
| H | 28.444449460 | 73.270837863 | 50.853856644 |
| H | 28.642564227 | 74.295870087 | 49.453074111 |
| H | 26.903359730 | 75.623471940 | 48.820241178 |
| H | 24.321793751 | 75.494384484 | 50.162781418 |
| H | 24.406149374 | 74.501887421 | 48.684225925 |
| H | 23.573840831 | 76.778246752 | 48.198869323 |
| H | 25.033228782 | 77.493915021 | 48.912966881 |
| H | 32.431853802 | 68.678582249 | 57.264046977 |
| H | 32.273908652 | 70.756243646 | 54.334798895 |
| H | 17.805069567 | 68.397856411 | 61.795300008 |
| C | 16.799331941 | 64.674444356 | 49.033949350 |
| O | 15.871046960 | 65.200724700 | 48.413368754 |
| H | 16.849535000 | 63.603478000 | 49.253524000 |
| O | 22.479645970 | 66.129784626 | 48.714302841 |
| C | 22.145641407 | 65.894565812 | 47.343233169 |
| H | 22.982507000 | 66.274601000 | 46.742711000 |
| H | 18.548727025 | 64.715109587 | 50.030492470 |
| H | 21.957957800 | 65.468877866 | 49.223331701 |
| H | 20.601667000 | 66.337713000 | 45.892815000 |
| H | 20.992916612 | 67.688065055 | 46.958714262 |
| H | 22.055332129 | 64.817006549 | 47.153192080 |
| H | 33.334852547 | 68.404237196 | 53.414193530 |
| H | 31.919450028 | 67.018993720 | 54.764747228 |
| H | 23.073901009 | 69.169245698 | 57.280881859 |
| H | 14.634821341 | 64.859006964 | 60.513068393 |
| H | 17.945662409 | 66.948779314 | 59.223140218 |

**Cartesian coordinates of the optimized Fe1·Fe2·Fe3·Fe4 state K144A 4Fe-4S quantum cluster model in chain-A.**

199 atoms

|    |              |              |              |
|----|--------------|--------------|--------------|
| Fe | -0.144539720 | 0.196975706  | -0.081662473 |
| Fe | -0.245547735 | 0.093471428  | 2.608586257  |
| Fe | 2.157733280  | 0.128683596  | 1.357114349  |
| Fe | 0.656450272  | -2.058096363 | 1.144667721  |
| S  | 1.549709570  | -1.346762810 | 3.028719584  |
| S  | 1.828131163  | -0.958191792 | -0.555516387 |
| S  | -1.510088508 | -1.179246970 | 1.231168536  |
| S  | 0.538766374  | 1.792018095  | 1.274793729  |
| S  | -1.213728320 | 1.210444745  | 4.387821635  |
| S  | 4.310417364  | 0.743907225  | 1.617286379  |
| S  | 0.871519588  | -4.257752479 | 0.497020769  |
| S  | -1.026377570 | 0.973455188  | -2.039924457 |
| N  | 2.812448972  | -1.144235117 | 8.372553786  |
| C  | 2.637610287  | -2.544295466 | 8.058889141  |
| C  | 3.905498942  | -3.231916668 | 7.521788363  |
| N  | 4.779311669  | -2.443796413 | 6.879809248  |
| O  | 4.026239451  | -4.460180023 | 7.657665862  |
| C  | 1.514590873  | -2.708143239 | 7.036775623  |
| C  | 0.145776715  | -2.228411752 | 7.510617751  |
| C  | -0.834718271 | -2.255721559 | 6.340420228  |
| N  | -2.146327437 | -1.707827787 | 6.658423801  |
| C  | -3.194582402 | -2.364724204 | 7.142315038  |
| N  | -3.138723046 | -3.663138384 | 7.434378422  |
| N  | -4.351057333 | -1.702824618 | 7.321199643  |
| H  | 2.384682756  | -3.071675198 | 8.984167769  |
| H  | 1.457685146  | -3.766530257 | 6.787462466  |
| H  | 1.800434369  | -2.176120872 | 6.122352578  |
| H  | 0.203181950  | -1.202523485 | 7.890415999  |
| H  | -0.211348637 | -2.865253741 | 8.329337480  |
| H  | -0.949835090 | -3.266219306 | 5.948266559  |
| H  | -0.445716832 | -1.636691219 | 5.531832822  |
| H  | -2.260023283 | -0.709360962 | 6.511711330  |
| H  | -2.384065790 | -4.251659661 | 7.093097071  |
| H  | -4.006171862 | -4.142618411 | 7.651859486  |
| H  | -4.312719592 | -0.690154037 | 7.382939658  |
| H  | -5.047549491 | -2.136519163 | 7.918862695  |
| H  | 2.538318941  | -0.441901919 | 7.687048409  |
| C  | 5.977111000  | -2.929906000 | 6.238907000  |
| H  | 6.869350000  | -2.636805000 | 6.801957000  |
| C  | 2.007541964  | 5.096863435  | 0.558304007  |
| H  | 1.743299000  | 6.022431000  | 0.036064000  |
| C  | 2.693467027  | 5.355877522  | 1.881632020  |
| O  | 2.561421422  | 4.601486240  | 2.855244407  |
| C  | 2.826115350  | 4.170938441  | -0.361236480 |

|   |              |              |              |
|---|--------------|--------------|--------------|
| C | 4.201817764  | 4.604468308  | -0.714376983 |
| N | 4.503115478  | 5.650132570  | -1.565363840 |
| C | 5.820323090  | 5.763195191  | -1.718525440 |
| N | 6.376502281  | 4.814275844  | -0.976881696 |
| C | 5.406405184  | 4.080900984  | -0.346048050 |
| H | 1.071523408  | 4.580277634  | 0.777154490  |
| H | 2.255141145  | 4.026576917  | -1.282882422 |
| H | 2.917631749  | 3.196429434  | 0.116167138  |
| H | 3.831413838  | 6.246312474  | -2.042071826 |
| H | 5.643312777  | 3.242209284  | 0.285402693  |
| H | 6.335950163  | 6.486869947  | -2.328285207 |
| H | 7.379278827  | 4.663004000  | -0.894333609 |
| N | 1.856169819  | 2.444883833  | -6.992414952 |
| C | 1.539951000  | 3.763438000  | -6.462627000 |
| H | 1.476316000  | 4.465197000  | -7.300786000 |
| C | 0.600139221  | 3.064758941  | 5.650834713  |
| H | 0.982050000  | 4.110914000  | 5.606559000  |
| C | 1.749542100  | 2.065825801  | 5.613363571  |
| N | 2.568122038  | 2.101465341  | 4.534639949  |
| O | 1.941730204  | 1.276341840  | 6.551524102  |
| C | -0.458234231 | 2.896883357  | 4.552823618  |
| H | 0.137540461  | 2.935474359  | 6.633947941  |
| H | -1.283220901 | 3.583046328  | 4.778175521  |
| H | -0.050034124 | 3.177450482  | 3.582130960  |
| C | 3.741267468  | 1.243701718  | 4.437453430  |
| C | 4.634344640  | 1.377105116  | 5.664618920  |
| N | 4.848478381  | 2.629101260  | 6.087704335  |
| O | 5.222167206  | 0.405332353  | 6.152798605  |
| H | 2.428199248  | 2.814222611  | 3.823682266  |
| C | 4.622262421  | 1.590073606  | 3.220573579  |
| H | 3.441021090  | 0.196938488  | 4.397922236  |
| H | 4.597010178  | 2.672489178  | 3.058796929  |
| H | 5.655146174  | 1.330713512  | 3.473321348  |
| H | 5.323203000  | 2.690085000  | 6.970952000  |
| H | 0.913280561  | -5.169970008 | -2.390702619 |
| C | -0.076931442 | -5.323146549 | -1.951690960 |
| C | -1.121015034 | -5.077908007 | -3.012873410 |
| N | -2.225150430 | -5.834260580 | -2.943215550 |
| O | -1.005769704 | -4.160725881 | -3.844589613 |
| C | -0.351988884 | -4.278101468 | -0.865378165 |
| H | -0.137435575 | -6.338515473 | -1.547109648 |
| H | -0.347090072 | -3.293242921 | -1.333853327 |
| H | -1.346357534 | -4.443590117 | -0.437128310 |
| H | -3.034079000 | -5.540736000 | -3.483254000 |
| N | -2.441811576 | -1.116416310 | -4.092100095 |
| C | -1.392344028 | -0.233881081 | -4.539824077 |
| C | -0.674636879 | -0.705064787 | -5.813125889 |
| N | -0.971267746 | -1.935288262 | -6.242354397 |
| O | 0.146511327  | 0.045820480  | -6.355420715 |

|   |              |              |              |
|---|--------------|--------------|--------------|
| C | -0.362604066 | -0.033679726 | -3.425707863 |
| H | -1.853385630 | 0.723224959  | -4.798060133 |
| H | -0.027892634 | -1.008527346 | -3.060397943 |
| H | 0.502485696  | 0.467601396  | -3.857322660 |
| C | -0.358250000 | -2.570636000 | -7.389921000 |
| H | -1.111312000 | -2.639925000 | -8.181831000 |
| C | 1.024796395  | -6.172020935 | 5.297517751  |
| C | -0.381202231 | -6.384679047 | 5.806496618  |
| H | 1.466691000  | -7.130947000 | 5.085305000  |
| N | -0.964802344 | -7.529615461 | 5.418589463  |
| O | -0.942383583 | -5.587328642 | 6.576674390  |
| C | 1.172779600  | -5.394337274 | 3.994759458  |
| O | 0.291614764  | -6.012699886 | 3.044233304  |
| C | 2.627036458  | -5.457299971 | 3.537865294  |
| H | 1.609254699  | -5.700846682 | 6.088111931  |
| H | 0.875399507  | -4.349926529 | 4.139264043  |
| H | 0.373810455  | -5.486204988 | 2.205674506  |
| H | 2.784264283  | -4.852928015 | 2.641734438  |
| H | 2.895701862  | -6.496951344 | 3.310488239  |
| H | 3.297886321  | -5.087420075 | 4.319697343  |
| H | -1.938787000 | -7.684525000 | 5.661722000  |
| C | 3.080778000  | 0.711402000  | -8.141230000 |
| H | 3.027971000  | 0.637566000  | -9.232461000 |
| C | 2.910362646  | 2.171393095  | -7.772868584 |
| O | 3.701720338  | 3.048051651  | -8.178335673 |
| C | 4.469375333  | 0.177051292  | -7.745356388 |
| C | 4.686497028  | -1.299821229 | -8.093367596 |
| C | 4.127174020  | -2.300370970 | -7.084140384 |
| N | 4.835645746  | -2.284549859 | -5.801788745 |
| C | 5.963889004  | -2.932761345 | -5.503817007 |
| N | 6.605076718  | -2.623032971 | -4.368911530 |
| N | 6.446010429  | -3.884251711 | -6.297016668 |
| H | 2.282101537  | 0.105254636  | -7.713198256 |
| H | 4.654404854  | 0.354928890  | -6.678917772 |
| H | 5.215880609  | 0.762458782  | -8.290637508 |
| H | 5.761408753  | -1.493052406 | -8.199733207 |
| H | 4.231874553  | -1.522736934 | -9.068309010 |
| H | 4.153753723  | -3.313616872 | -7.494236335 |
| H | 3.080407287  | -2.104153084 | -6.845440963 |
| H | 4.516033838  | -1.619542197 | -5.106593289 |
| H | 6.524375933  | -1.680822787 | -4.004502512 |
| H | 7.481669190  | -3.092495367 | -4.165003039 |
| H | 5.838097113  | -4.361924103 | -6.951950882 |
| H | 7.270026692  | -4.395147250 | -5.997911872 |
| N | 3.489086753  | 6.436760978  | 1.945488460  |
| H | 4.046672000  | 6.552932000  | 2.783092000  |
| C | 6.118509144  | -2.534096495 | 4.775778759  |
| H | 5.273395434  | -2.908031213 | 4.188356485  |
| C | 2.585915467  | 4.280238845  | -5.444914452 |



|   |              |              |               |
|---|--------------|--------------|---------------|
| C | 2.992717679  | 3.267220451  | -4.416426348  |
| C | 2.144371628  | 2.612553461  | -3.559210914  |
| N | 2.832423922  | 1.675128546  | -2.833554458  |
| C | 4.151366219  | 1.703362000  | -3.189666080  |
| C | 4.294876313  | 2.708085452  | -4.185933042  |
| C | 5.222000959  | 0.941404091  | -2.724136617  |
| C | 6.473313804  | 1.198596663  | -3.262841848  |
| C | 6.649582049  | 2.200888091  | -4.235542875  |
| C | 5.580074897  | 2.954390434  | -4.693699016  |
| C | 0.158347059  | -3.976985130 | -7.040865947  |
| H | 0.736894000  | -4.386578000 | -7.879897000  |
| O | 1.034559585  | -3.981657081 | -5.913029688  |
| C | -3.756400938 | -0.834810256 | -4.116946768  |
| O | -4.283111423 | 0.154115613  | -4.634513775  |
| H | -4.321425000 | -1.617047000 | -3.604721000  |
| C | 3.248216378  | -0.686214639 | 9.555140726   |
| O | 3.610123990  | -1.372738534 | 10.517978776  |
| H | 3.237939000  | 0.408880000  | 9.561120000   |
| N | 5.685215154  | 4.785242694  | -9.711400030  |
| C | 6.766777249  | 4.063506617  | -9.381649429  |
| N | 6.750749884  | 3.408908253  | -8.211676521  |
| N | 7.846940163  | 4.081347616  | -10.149707634 |
| C | 9.095943897  | 3.361601094  | -9.894271082  |
| C | 9.027971000  | 1.861262000  | -10.151451000 |
| H | 8.816379000  | 1.617659000  | -11.197832000 |
| H | 4.612130844  | -1.442774718 | 6.827446266   |
| H | 1.284083682  | 1.665761139  | -6.680593046  |
| H | 4.233718334  | 3.389650067  | 5.834880350   |
| H | -2.365183072 | -6.506084481 | -2.197062774  |
| H | -1.720322792 | -2.433186065 | -5.773464770  |
| H | -0.549770154 | -8.118290737 | 4.706218661   |
| H | 3.643926842  | 7.058266068  | 1.161887032   |
| H | 7.039823407  | -2.979067182 | 4.380254406   |
| H | 6.174983520  | -1.451312262 | 4.653060197   |
| H | 0.554755741  | 3.687474532  | -5.996679592  |
| H | 2.156375963  | 5.175167392  | -4.972401173  |
| H | 3.470308856  | 4.609072661  | -5.994986280  |
| H | 1.084382694  | 2.741203564  | -3.402638150  |
| H | 2.431871601  | 1.074051860  | -2.121947347  |
| H | 5.085466136  | 0.189464251  | -1.953212533  |
| H | 7.333526225  | 0.631511831  | -2.913523220  |
| H | 7.648087699  | 2.389255499  | -4.623704406  |
| H | 5.744352492  | 3.737599132  | -5.425912713  |
| H | -2.167188410 | -1.950774367 | -3.579479008  |
| H | 0.455217907  | -1.929121790 | -7.727853337  |
| H | -0.695761942 | -4.645683488 | -6.865104064  |
| H | 0.456937801  | -3.963778429 | -5.119533083  |
| H | 10.002674909 | 1.427178222  | -9.898667945  |
| H | 8.272462401  | 1.365597725  | -9.535628347  |

|   |             |              |               |
|---|-------------|--------------|---------------|
| H | 9.837803924 | 3.826521280  | -10.548967810 |
| H | 9.415147566 | 3.566252540  | -8.865440017  |
| H | 7.786238656 | 4.629070670  | -11.003459183 |
| H | 5.609690109 | 5.121476157  | -10.665836917 |
| H | 4.805411933 | 4.514698268  | -9.276445254  |
| H | 7.504958602 | 2.774477414  | -7.988398224  |
| H | 5.832743423 | 3.164225281  | -7.848882242  |
| H | 5.939707193 | -4.023057639 | 6.306787206   |

**Cartesian coordinates of the optimized Fe1·Fe2·Fe3·Fe4 state K144A 4Fe-4S quantum cluster model in chain-B.**

238 atoms

|    |              |              |              |
|----|--------------|--------------|--------------|
| Fe | 19.268335560 | 67.144381298 | 56.343164714 |
| Fe | 17.376200400 | 65.191752674 | 56.405553394 |
| Fe | 19.766953580 | 64.805121281 | 55.143483781 |
| Fe | 17.883098382 | 66.469388509 | 54.085820800 |
| S  | 17.673193087 | 64.184435227 | 54.414749976 |
| S  | 20.118713271 | 66.940447334 | 54.315918322 |
| S  | 17.008582048 | 67.378250176 | 55.889465724 |
| S  | 19.513948877 | 65.059175055 | 57.288876755 |
| S  | 15.588360345 | 64.768911827 | 57.785182040 |
| C  | 15.122855075 | 66.335184712 | 58.635127693 |
| S  | 20.388074653 | 68.751871693 | 57.490744061 |
| C  | 19.905033813 | 68.895320328 | 59.250410433 |
| S  | 21.488302176 | 63.502554556 | 54.398534654 |
| C  | 20.971145355 | 63.178838350 | 52.674317423 |
| S  | 17.122956274 | 67.241353475 | 52.084506078 |
| C  | 18.474698112 | 67.264269791 | 50.851460825 |
| H  | 15.379391155 | 67.164073946 | 57.976575049 |
| H  | 14.030627707 | 66.318570800 | 58.735843029 |
| H  | 20.815330046 | 69.190783935 | 59.780768421 |
| H  | 19.190256431 | 69.718486442 | 59.362621245 |
| H  | 20.462644676 | 62.208875257 | 52.649730366 |
| H  | 20.241797878 | 63.939205804 | 52.392206277 |
| H  | 18.832152294 | 68.288094812 | 50.740240193 |
| H  | 19.318835026 | 66.660318402 | 51.197157226 |
| C  | 24.644002000 | 76.620997000 | 48.376996000 |
| C  | 24.906773378 | 75.402352710 | 49.235949019 |
| N  | 26.343827156 | 75.240257367 | 49.451219081 |
| C  | 26.910555091 | 74.297229615 | 50.203496348 |
| N  | 28.226394238 | 74.091161872 | 50.131487156 |
| N  | 26.177129048 | 73.547221170 | 51.034642944 |
| H  | 25.141613000 | 76.554792000 | 47.403845000 |
| C  | 21.415000000 | 71.340995000 | 47.975998000 |

|   |              |              |              |
|---|--------------|--------------|--------------|
| C | 20.195200684 | 72.132028118 | 48.405828949 |
| O | 20.134925473 | 73.365842520 | 48.257903534 |
| C | 22.655200874 | 71.705696386 | 48.796479825 |
| C | 23.955855826 | 71.123590637 | 48.241108684 |
| C | 24.073049617 | 69.600463261 | 48.282420309 |
| N | 23.976558624 | 69.054357099 | 49.635245442 |
| C | 24.943080068 | 69.120638496 | 50.558977740 |
| N | 24.635967322 | 68.767933963 | 51.827044291 |
| N | 26.162204993 | 69.518660224 | 50.248430335 |
| H | 21.618741000 | 71.609153000 | 46.934073000 |
| N | 19.205745792 | 71.406310231 | 48.957418529 |
| C | 17.991000000 | 71.973996000 | 49.510997000 |
| C | 18.201255198 | 72.681850965 | 50.869631264 |
| C | 19.048099105 | 71.930432239 | 51.844791298 |
| C | 18.797272579 | 70.673230403 | 52.328770369 |
| C | 20.309476231 | 72.327415386 | 52.398977908 |
| N | 19.824245946 | 70.266305960 | 53.140327275 |
| C | 20.770104581 | 71.250873887 | 53.205110481 |
| C | 21.103967204 | 73.480574133 | 52.312357545 |
| C | 21.981723051 | 71.288630968 | 53.890733725 |
| C | 22.308051888 | 73.524526717 | 52.998319992 |
| C | 22.749403703 | 72.436695803 | 53.773885820 |
| H | 17.633684000 | 72.744707000 | 48.820089000 |
| C | 15.749467719 | 70.922586945 | 56.272169046 |
| C | 16.058147820 | 70.978330202 | 57.759283375 |
| O | 16.212321585 | 69.951399732 | 58.433895127 |
| C | 17.019617362 | 70.939399277 | 55.400362695 |
| C | 17.888570603 | 72.134051644 | 55.533036591 |
| N | 17.583671332 | 73.384454557 | 55.032655396 |
| C | 19.107303824 | 72.268424239 | 56.129599903 |
| C | 18.564434418 | 74.243715034 | 55.297738991 |
| N | 19.493116306 | 73.572769573 | 55.967180366 |
| H | 15.078911000 | 71.721456000 | 55.939196000 |
| N | 16.174890324 | 72.206081455 | 58.306100022 |
| H | 16.562673000 | 72.275889000 | 59.244498000 |
| N | 19.506560802 | 63.814494152 | 62.711775634 |
| C | 20.331197463 | 62.828089263 | 62.047332983 |
| C | 21.790682546 | 63.270866326 | 61.814169512 |
| O | 22.667427377 | 62.398969587 | 61.709296399 |
| C | 19.705806352 | 62.451606552 | 60.701279607 |
| C | 18.336027276 | 61.780271805 | 60.789273386 |
| C | 17.752337249 | 61.635318546 | 59.383474448 |
| N | 16.440764388 | 60.997339363 | 59.349718513 |
| C | 16.193717194 | 59.693403073 | 59.291891770 |
| N | 14.921931571 | 59.271464958 | 59.182193757 |
| N | 17.176354473 | 58.791865381 | 59.329195539 |
| C | 19.406011179 | 63.955346110 | 64.042509365 |
| O | 20.028400718 | 63.315114803 | 64.899383125 |
| H | 18.677061000 | 64.732842000 | 64.291576000 |

|   |              |              |              |
|---|--------------|--------------|--------------|
| N | 22.004058865 | 64.589300681 | 61.677818634 |
| C | 23.289001000 | 65.171998000 | 61.339999000 |
| C | 23.268299359 | 66.057575456 | 60.101251259 |
| H | 24.296234680 | 66.364725173 | 59.870110298 |
| H | 23.715284000 | 65.719872000 | 62.186842000 |
| C | 22.355536709 | 60.399580072 | 58.484156247 |
| C | 21.371833341 | 59.258929395 | 58.348229550 |
| O | 20.212604975 | 59.340567636 | 58.786883207 |
| C | 22.118574690 | 61.537823250 | 57.499826623 |
| O | 22.171369774 | 60.958557862 | 56.183195250 |
| C | 23.175892396 | 62.617795101 | 57.682854593 |
| H | 23.378128000 | 60.073913000 | 58.312272000 |
| N | 21.824966527 | 58.148889074 | 57.743975864 |
| H | 21.170100000 | 57.394184000 | 57.563116000 |
| C | 15.698730475 | 66.570481558 | 60.035213486 |
| C | 17.198516304 | 66.486829744 | 60.234137165 |
| H | 15.420306000 | 67.594069000 | 60.325163000 |
| O | 17.726136042 | 65.597504770 | 60.914687926 |
| N | 17.914856235 | 67.513152822 | 59.712642473 |
| C | 19.342178353 | 67.641586399 | 59.934360442 |
| C | 19.713146166 | 67.752435049 | 61.409090946 |
| O | 20.766501577 | 67.262236805 | 61.836530079 |
| N | 18.930604769 | 68.509635210 | 62.179107174 |
| H | 19.238077000 | 68.583743000 | 63.137216000 |
| N | 17.829743130 | 65.335658273 | 49.499633081 |
| C | 18.020176558 | 66.766434205 | 49.474825360 |
| C | 19.033561741 | 67.251511232 | 48.429659970 |
| O | 19.167880633 | 68.469537292 | 48.247890594 |
| N | 19.744212900 | 66.309584508 | 47.800102992 |
| C | 20.853000000 | 66.607000000 | 46.924000000 |
| C | 22.100927472 | 63.185044188 | 51.632789425 |
| C | 21.378623570 | 63.025410388 | 50.315592149 |
| O | 20.913448522 | 64.003482695 | 49.704706734 |
| H | 22.652466000 | 64.135944000 | 51.642252000 |
| N | 21.152661817 | 61.765348087 | 49.910684521 |
| H | 20.434047000 | 61.601916000 | 49.210267000 |
| S | 26.848492709 | 70.856337703 | 54.854352391 |
| O | 27.133824506 | 70.999789126 | 56.291598851 |
| O | 26.313124623 | 72.067043438 | 54.218868309 |
| O | 26.141831903 | 69.611478354 | 54.508872411 |
| P | 28.821577553 | 70.594041234 | 52.641765229 |
| O | 28.251156993 | 69.337871672 | 52.032641458 |
| O | 28.605117437 | 71.928872769 | 51.981937562 |
| O | 28.417664995 | 70.678661125 | 54.259597199 |
| O | 30.441160222 | 70.475598278 | 52.857467028 |
| C | 31.071300456 | 69.235579773 | 53.248702719 |
| C | 32.085008011 | 69.522445452 | 54.349889858 |
| O | 31.471411385 | 69.492339227 | 55.677956878 |
| C | 33.246374087 | 68.545846845 | 54.426850199 |

|   |              |              |              |
|---|--------------|--------------|--------------|
| O | 34.370824593 | 69.234223939 | 54.982787387 |
| C | 32.710342265 | 67.492421303 | 55.386625224 |
| O | 33.755303064 | 66.732957232 | 55.959428305 |
| C | 31.915223798 | 68.356571305 | 56.381511586 |
| N | 30.749311724 | 67.633418974 | 56.936252344 |
| C | 29.458935478 | 68.079537586 | 57.082655916 |
| N | 28.682183480 | 67.235003499 | 57.733404410 |
| C | 29.519276995 | 66.184311844 | 58.046562771 |
| C | 29.315611216 | 64.966721734 | 58.721688347 |
| N | 28.115416889 | 64.577153871 | 59.186313620 |
| N | 30.367810360 | 64.133873100 | 58.875096891 |
| C | 31.553324337 | 64.485727067 | 58.365948920 |
| N | 31.864054190 | 65.601381944 | 57.698379131 |
| C | 30.805632684 | 66.417163270 | 57.568786497 |
| H | 15.254157200 | 65.872680403 | 60.750034903 |
| H | 18.913097300 | 64.413424254 | 62.139604390 |
| H | 17.437025712 | 68.232083714 | 59.175717585 |
| H | 19.858258545 | 66.754628972 | 59.567759677 |
| H | 17.066092265 | 67.226387796 | 49.202882584 |
| H | 19.525155362 | 65.336617561 | 47.983620130 |
| H | 22.802839688 | 62.364470619 | 51.814047321 |
| H | 21.442229109 | 60.975211288 | 50.476369262 |
| H | 22.989346948 | 63.462004920 | 57.014787963 |
| H | 23.167501596 | 62.987378814 | 58.710974317 |
| H | 24.171280105 | 62.210733999 | 57.463938061 |
| H | 21.929257150 | 61.687692977 | 55.556423177 |
| H | 21.122617701 | 61.964416761 | 57.664151713 |
| H | 22.296375008 | 60.777167237 | 59.507728762 |
| H | 22.737206260 | 58.112428854 | 57.304575525 |
| H | 16.944061514 | 57.826593137 | 59.117846150 |
| H | 18.139311965 | 59.055868579 | 59.140506702 |
| H | 14.727908974 | 58.300714133 | 59.407843451 |
| H | 14.182796801 | 59.918935688 | 59.438748277 |
| H | 15.632785631 | 61.612180485 | 59.338315107 |
| H | 18.433163678 | 61.090176383 | 58.727625929 |
| H | 17.609289757 | 62.623777688 | 58.946813785 |
| H | 18.432224026 | 60.797822850 | 61.267861590 |
| H | 17.641838776 | 62.375566582 | 61.393177072 |
| H | 19.636504263 | 63.356397424 | 60.088309657 |
| H | 20.394859072 | 61.773934080 | 60.198264903 |
| H | 20.394489565 | 61.945643153 | 62.691973931 |
| H | 21.235569153 | 65.241866955 | 61.803947762 |
| H | 23.963453291 | 64.327469683 | 61.169681073 |
| H | 22.866337384 | 65.519499122 | 59.238377227 |
| H | 22.668868541 | 66.954401264 | 60.260547800 |
| H | 23.697165375 | 69.004449828 | 52.133418529 |
| H | 25.336658970 | 68.946697681 | 52.548448499 |
| H | 26.920942469 | 69.513677088 | 50.960107399 |
| H | 26.456651422 | 69.486978738 | 49.278801539 |

|   |              |              |              |
|---|--------------|--------------|--------------|
| H | 23.203204918 | 68.427163074 | 49.831085559 |
| H | 23.270554952 | 69.131315438 | 47.713078880 |
| H | 25.007186601 | 69.276099497 | 47.806962717 |
| H | 24.081255158 | 71.423931635 | 47.191178557 |
| H | 24.796256626 | 71.557754140 | 48.794414483 |
| H | 22.744256398 | 72.796784960 | 48.796339852 |
| H | 22.515944292 | 71.408632299 | 49.842905215 |
| H | 21.209118403 | 70.269473611 | 48.013922386 |
| H | 19.307063665 | 70.397836413 | 48.977617033 |
| H | 17.251498549 | 71.173740436 | 49.585479288 |
| H | 18.662864923 | 73.653430961 | 50.674376909 |
| H | 17.202409904 | 72.886914875 | 51.281171850 |
| H | 20.788748700 | 74.328282499 | 51.710128786 |
| H | 22.927669554 | 74.416594788 | 52.937618583 |
| H | 23.709715639 | 72.487554389 | 54.275799488 |
| H | 22.311841051 | 70.452915042 | 54.502282576 |
| H | 19.877178967 | 69.362267098 | 53.595387110 |
| H | 17.955430142 | 70.018823830 | 52.166420092 |
| H | 20.366156165 | 73.974746600 | 56.299370960 |
| H | 18.596630837 | 75.284332741 | 55.020442349 |
| H | 16.744559461 | 73.632437283 | 54.514300863 |
| H | 19.720913372 | 71.542807499 | 56.636765742 |
| H | 17.628504317 | 70.071018872 | 55.643988506 |
| H | 16.705030145 | 70.833144714 | 54.356913738 |
| H | 15.239003232 | 69.974353359 | 56.086542819 |
| H | 16.159769854 | 73.047043112 | 57.741976754 |
| H | 33.307165372 | 66.156114308 | 56.638239849 |
| H | 34.930766392 | 68.540948926 | 55.391979798 |
| H | 28.082794811 | 63.780241061 | 59.814290102 |
| H | 27.368959821 | 65.254732917 | 59.259090212 |
| H | 32.363837443 | 63.776381768 | 58.514240442 |
| H | 29.143331855 | 69.030700268 | 56.683944532 |
| H | 30.331038610 | 68.505894801 | 53.581991329 |
| H | 31.589874952 | 68.845058814 | 52.366663014 |
| H | 26.684752216 | 72.928318938 | 51.668008408 |
| H | 25.294870032 | 73.909402143 | 51.372095923 |
| H | 28.615237590 | 73.322328691 | 50.684336823 |
| H | 28.731722530 | 74.388581146 | 49.303544660 |
| H | 26.960514644 | 75.728652991 | 48.808997206 |
| H | 24.410774482 | 75.533860872 | 50.204072105 |
| H | 24.509833133 | 74.502784224 | 48.754032075 |
| H | 23.566870552 | 76.714097620 | 48.203735255 |
| H | 24.989981441 | 77.528429719 | 48.884949239 |
| H | 32.537888604 | 68.654802716 | 57.235180427 |
| H | 32.471662490 | 70.538585925 | 54.211441406 |
| H | 18.010977058 | 68.833429606 | 61.908446685 |
| C | 16.761835559 | 64.671117343 | 49.022724195 |
| O | 15.808328421 | 65.159833194 | 48.410500693 |
| H | 16.849534000 | 63.603479000 | 49.253524000 |

|   |              |              |              |
|---|--------------|--------------|--------------|
| O | 22.487007801 | 66.156084924 | 48.716479416 |
| C | 22.145156163 | 65.901954774 | 47.349428065 |
| H | 22.982507000 | 66.274601000 | 46.742710000 |
| H | 18.516693810 | 64.779521484 | 50.000993534 |
| H | 21.963534595 | 65.506167916 | 49.237252647 |
| H | 20.601666000 | 66.337713000 | 45.892815000 |
| H | 20.992600996 | 67.688935123 | 46.954401222 |
| H | 22.059073998 | 64.821562755 | 47.175536770 |
| H | 33.502150657 | 68.115238447 | 53.451532269 |
| H | 32.005326545 | 66.850504179 | 54.837810281 |
