# Supplementary material
Source: PubMed Central journal article supplement (PMC3134165)

# Supplementary Figure 1

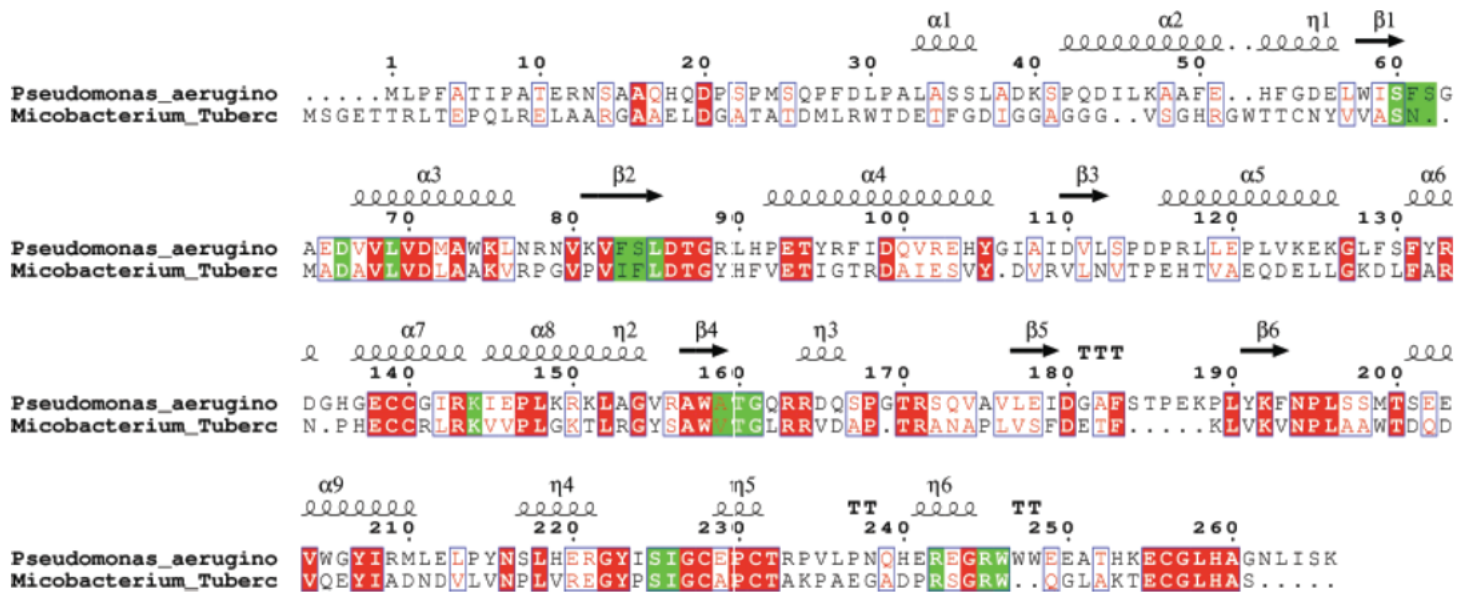

Supplement: NIHMS305704-supplement-1_si_001.pdf [file NIHMS305704-supplement-1_si_001.pdf]

## Supplementary Figure 2

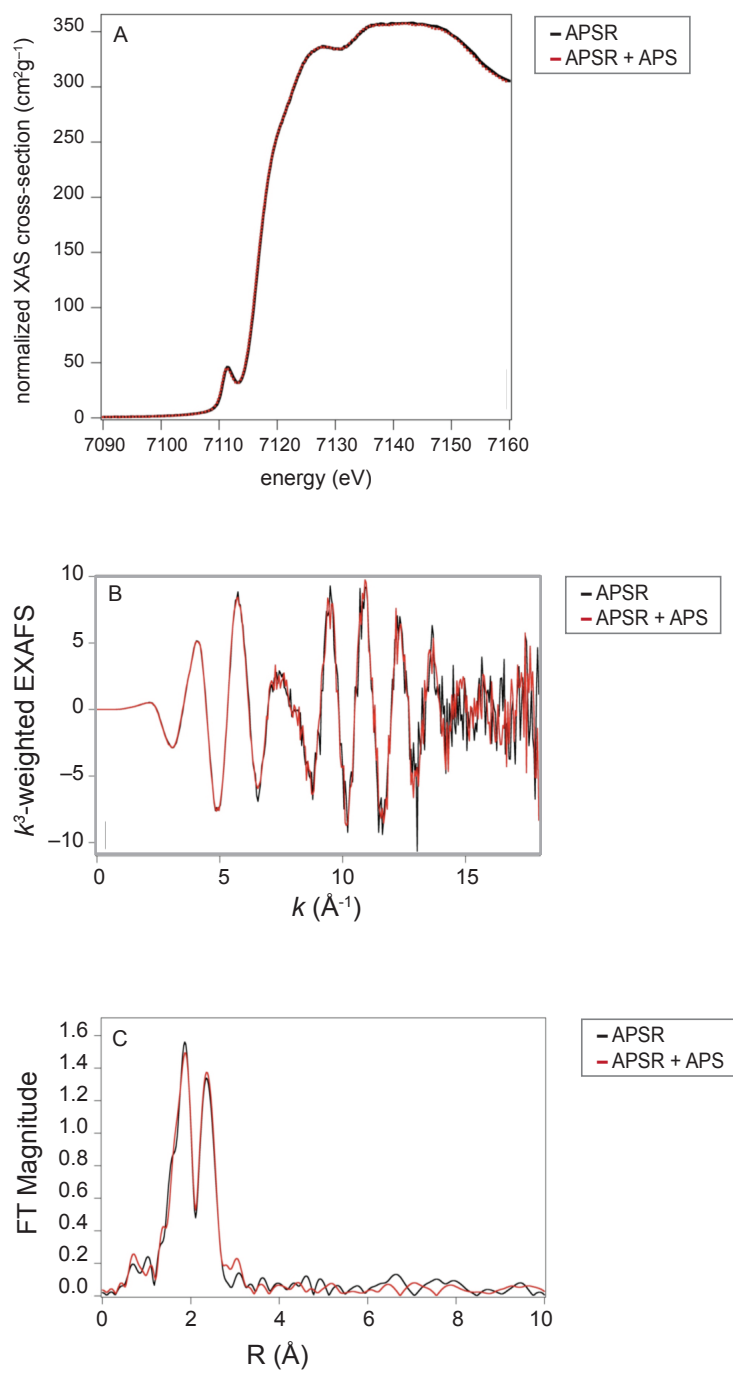

Supplement: NIHMS305704-supplement-2_si_002.pdf [file NIHMS305704-supplement-2_si_002.pdf]

### Supplementary Figure 3

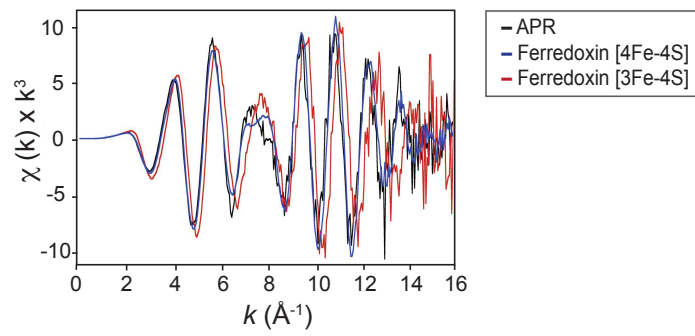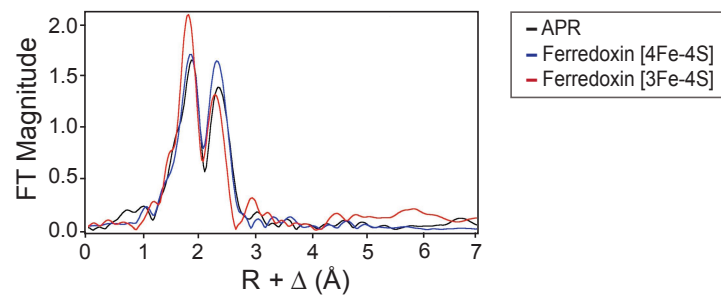

Supplement: NIHMS305704-supplement-3_si_003.pdf [file NIHMS305704-supplement-3_si_003.pdf]
